# Supplementary material
Source: PubMed Central journal article supplement (PMC8860303)
Supplement: NIHMS1778271-supplement-Supp_Info.pdf [file NIHMS1778271-supplement-Supp_Info.pdf]

## Supporting Information

Development of a genetically-encoded biosensor for reporting the methyltransferase-dependent biosynthesis of semi-synthetic macrolide antibiotics

Yiwei Li<sup>1</sup>, Megan Reed<sup>2</sup>, H. Tonie Wright<sup>3</sup>, Thomas A. Cropp<sup>2,3</sup>, and Gavin J. Williams<sup>1,4</sup>

\*

<sup>1</sup> Department of Chemistry, NC State University, Raleigh, North Carolina 27695, United States

<sup>2</sup> Department of Chemistry, Virginia Commonwealth University, Richmond, VA 23284, United States

<sup>3</sup> Institute for Structural Biology, Drug Discovery and Development, Virginia Commonwealth University, Richmond, VA 23219, United States

<sup>4</sup> Comparative Medicine Institute, NC State University, Raleigh, North Carolina 27695, United States

\* Corresponding author, [gjwillia@ncsu.edu](mailto:gjwillia@ncsu.edu)

### Table of Contents

#### Supplemental Tables

**Supplementary Table S1.** Sequences of DNA constructs.

**Supplementary Table S2.** Strains and plasmids used in this study.

**Supplementary Table S3.** Oligonucleotides used in this study.

**Supplementary Table S4.** Data collection and refinement statistics.

**Supplementary Table S5.** LC-HRMS gradient and scan parameters.

#### Supplemental Figures

**Supplementary Figure S1.** Characterization of site-directed MphR biosensor variants.

**Supplementary Figure S2.** The crystal structure of MphR (PDB: 3FRQ) complexed with ErA (green sticks).

**Supplementary Figure S3.** FACS analysis and sorting of an error-prone PCR MphR mutant library.

**Supplementary Figure S4.** Dose-response analysis of the macrolide specificity of mutants derived from M9C4.

**Supplementary Figure S5.** Dose-response analysis of RBS mutants of M9C4 MphR.

**Supplementary Figure S6.** Plasmid maps of the various MphR biosensor constructs.

**Supplementary Figure S7.** Representative LC-MS chromatograms of ErA production by *E. coli* BL21(DE3) pCOLADuet-EryG.

**Supplementary Figure S8.** ErA production by *E. coli* BL21(DE3) harboring various pSense constructs to determine the requirements for optimal *in vivo* EryG activity.

**Supplementary Figure S9.** Protein sequence of MphR M9C4 used for structural analysis.

### **Supplemental Methods**

**Supplementary Table S1.** Sequences of DNA constructs. RBS for each gene of interest is underlined. The promoter region for each gene of interest is bold italicized. Mutations are bolded and underlined.

| Construct Name | DNA Sequence                                                                                                                                                                                                                                                                                                                                                                                                                                                                                                                                                                                                                                                                                                                                                                                                                                                                                                                                                                                                                                                                                                                                                                                                                                                                                                                                                                                                                                                                                                                                                                                                                                                                                                                                                                                                                                                                                                                                                                                                                                                                                                                                                                                                                                                                                                                                                                                                                                                                                                                                                                                                                                                                                                |
|----------------|-------------------------------------------------------------------------------------------------------------------------------------------------------------------------------------------------------------------------------------------------------------------------------------------------------------------------------------------------------------------------------------------------------------------------------------------------------------------------------------------------------------------------------------------------------------------------------------------------------------------------------------------------------------------------------------------------------------------------------------------------------------------------------------------------------------------------------------------------------------------------------------------------------------------------------------------------------------------------------------------------------------------------------------------------------------------------------------------------------------------------------------------------------------------------------------------------------------------------------------------------------------------------------------------------------------------------------------------------------------------------------------------------------------------------------------------------------------------------------------------------------------------------------------------------------------------------------------------------------------------------------------------------------------------------------------------------------------------------------------------------------------------------------------------------------------------------------------------------------------------------------------------------------------------------------------------------------------------------------------------------------------------------------------------------------------------------------------------------------------------------------------------------------------------------------------------------------------------------------------------------------------------------------------------------------------------------------------------------------------------------------------------------------------------------------------------------------------------------------------------------------------------------------------------------------------------------------------------------------------------------------------------------------------------------------------------------------------|
| pMLGFP         | <p>GGTAATACGGTTATCCACAGAATCAGGGGATAACGCAGGAAAGAACATGTGAGCAAAAGGCCAGCAAAAGGCCAGGA<br/> ACCGTAAAAAGGCCGCGTTGCTGGCGTTTTTCCATAGGCTCCGCCCCCTGACGAGCATCACAAAATCGACGCTCAAG<br/> TCAGAGGTGGCGAAACCCGACAGGACTATAAAGATACCAGGCGTTTCCCCTGGAAGCTCCCTCGTGCGCTCTCTGTT<br/> CCGACCCTGCCGTTACCGGATACCTGTCCGCTTTCTCCCTTCGGGAAGCGTGGCGCTTCTCATAGCTCACGCTGTAG<br/> GTATCTCAGTTCGGTGTAGGTCGTTCCGCTCAAGCTGGGCTGTGTGCACGAACCCCCGTTCCAGCCGACCGCTGCGCC<br/> TTATCCGGTAACTATCGTCTGAGTCCAACCCGGTAAGACACGACTTATCGCCACTGGCAGCAGCCACTGGTAACAGGA<br/> TTAGCAGAGCGAGGTATGTAGGCGGTGCTACAGAGTTCTGAAGTGGTGGCCTAACTACGGCTACACTAGAAGGACAG<br/> TATTTGGTATCTGCGCTCTGCTGAAGCCAGTTACCTTCGGAAAAAGAGTTGGTAGCTCTTGATCCGGCAAAACAAACCAC<br/> CGCTGGTAGCGGTGGTTTTTTGTTTGAAGCAGCAGATTACGCGCAGAAAAAAGGATCTCAAGAAGATCCTTTGATC<br/> TTTTCTACGGGGTCTGACGCTCAGTGAACGAAAACCTCACGTTAAGGGATTTTGGTCATGAGATTATCAAAAAGGATCT<br/> TCACCTAGATCCTTTAAATTAATAAATGAAGTTTTAAATCAATCTAAAGTATATATGAGTAACTTGGTCTGACAGTTACC<br/> AATGCTTAATCAGTGAGGCACCTATCTCAGCGATCTGTCTATTTTCGTTTCATCCATAGTTGCCTGACTCCCCGTCGTGTAGA<br/> TAACTACGATACGGGAGGGCTTACCATCTGGCCCCAGTGCTGCAATGATACCGCGAGACCCACGCTCACCGGCTCCAGA<br/> TTTATCAGCAATAAACAGCCAGCCGGAAGGGCCGAGCGCAGAAGTGGTCTGCAACTTTATCCGCTCCATCCAGTCT<br/> ATTAATTGTTGCCGGGAAGCTAGAGTAAGTAGTTCGCCAGTTAATAGTTTGCACAACGTTGTTGCCATTGCTACAGGCA<br/> TCGTGGTGTACGCTCGTCGTTTGGTATGGCTTCATTCAGCTCCGGTCCCAACGATCAAGGCGAGTTACATGATCCCC<br/> ATGTTGTGCAAAAAAGCGGTTAGCTCCTTCGGTCTCCGATCGTTGTCAGAAGTAAGTTGGCCGAGTGTATCACTCAT<br/> GGTTATGGCAGCACTGCATAATTCTTACTGTCATGCCATCCGTAAGATGCTTTTCTGTGACTGGTGAAGTACTCAACCA<br/> AGTCATTCTGAGAATAGTGTATGCGGCGACCGAGTTGCTCTTGCCTGCGTCAACACGGGATAATACCGCGCCACATAG<br/> CAGAACTTTAAAGTGCTCATCATTGGAAAACGTTCTTCGGGGCGAAAACCTCAAGGATCTTACCGCTGTTGAGATCC<br/> AGTTCGATGTAACCCACTCGTGCACCCAAGTATCTTCAGCATCTTTACTTTACCAGCGTTTCTGGGTGAGCAAAAAC<br/> AGGAAGGCAAAATGCCGCAAAAAGGGAATAAGGGCGACACGGAAATGTTGAATACTCATACTCTTCTTTTCAATAT<br/> TATTGAAGCATTATCAGGGTTATTGTCTCATGAGCGGATACATATTTGAATGTATTTAGAAAAATAAACAAAAGAGTT<br/> TGTAGAAACGCAAAAAGGCCATCCGTCAGGATGGCCTTCTGCTTAATTTGATGCCTGGCAGTTTATGGCGGGCGTCTG<br/> CCCGCCACCCTCCGGGCGGTTGCTTCGCAACGTTCAAATCCGCTCCCGGCGGATTTGCCTACTCAGGAGAGCGTTCACC<br/> GACAAACAACAGATAAAAACGAAAGGCCAGTCTTTCGACTGAGCCTTTCGTTTTATTTGATGCCTGGCAGTTCCTACTC<br/> TCGCATGGGGAGACCCCACTACCATCGGCGCTACGGCGTTTCACTTCTGAGTTCGGCATGGGGTCAGGTGGGACCA<br/> CCGCGCTACTGCCGCCAGGCAAATTCTGTTTTATCAGACCGCTTCTGCGTTCTGATTAATCTGTATCAGGCTGAAAATCT<br/> TCTCTCATCCGCAAAACAGCCAAGCTGGAGACCGTTTAACTCAATGATGATGATGATGGTTCGACGGCGCTATTC<br/> AGATCCTCTTCTGAGATGAGTTTTTGTTCGGGCCAAGCTTATTTGTAGAGCTCATCCATGCCATGTGTAATCCCAGCAG<br/> CAGTTACAACTCAAGAAGGACCATGTGGTCACGCTTTTCGTTGGGATCTTTCGAAAGGGCAGATTGTGTCGACAGGTA</p> |

|         |                                                                                                                                                                                                                                                                                                                                                                                                                                                                                                                                                                                                                                                                                                                                                                                                                                                                                                                                                                                                                                                                                                                                                                                                                                                                                                                                                                                                                                                                                                                                                                                                                                                                     |
|---------|---------------------------------------------------------------------------------------------------------------------------------------------------------------------------------------------------------------------------------------------------------------------------------------------------------------------------------------------------------------------------------------------------------------------------------------------------------------------------------------------------------------------------------------------------------------------------------------------------------------------------------------------------------------------------------------------------------------------------------------------------------------------------------------------------------------------------------------------------------------------------------------------------------------------------------------------------------------------------------------------------------------------------------------------------------------------------------------------------------------------------------------------------------------------------------------------------------------------------------------------------------------------------------------------------------------------------------------------------------------------------------------------------------------------------------------------------------------------------------------------------------------------------------------------------------------------------------------------------------------------------------------------------------------------|
|         | <p>ATGGTTGTCTGGTAAAAGGACAGGGCCATCGCCAATTGGAGTATTTTGTGATAATGGTCTGCTAGTTGAACGGATCCA<br/> TCTTCAATGTTGTGGCGAATTTTGAAGTTAGCTTTGATTCCATTCTTTTGTGCTGCCGTGATGTATACATTGTGTGAG<br/> TTATAGTTGTA CTGAGTTTGTGTCCGAGAATGTTTCCATCTTCTTTAAAATCAATACCTTTTAACTCGATACGATTAACA<br/> AGGGTATCACCTTCAAACCTGACTTCAGCACGCGTCTTGTAGTCCCGTCATCTTTGAAAGATATAGTGCCTCCTGTAC<br/> ATAACCTTCGGGCATGGCACTCTGAAAAAGTCATGCCGTTTCATATGATCCGGATAACGGGAAAAGCATTGAACACCA<br/> TAAGAGAAAAGTAGTGACAAGTGTGGCCATGGAACAGGTAGTTTTCCAGTAGTGCAAATAAATTTAAGGGTAAGTTTTTC<br/> CGTATGTTGCATCACCTTCACCCTCTCCACTGACAGAAAATTTGTGCCATTAACATCACCATCTAATTCAACAAGAATTG<br/> GGACAACCTCCAGTGAAAAGTTCTTCTCCTTTACTCATACTAGTTTCTCCTGTTAGCCACCTAAATGTAACAGTCACGTC<br/> GGTTATATTCAATCCCACACAACATACGAGCCGGAAGCATAAAGTGTAAGCCTGGGGTGCCTAATGAGTGAGCTAAC<br/> TCACATTAATTGCGTTGCGCTCTAGAT<b>TGGTGCAAAACCTTTCGCGGTATGGCATGATAGCGCCCCCAACCCATACAGA</b><br/> <b>AGGTGAACACTGATGCCCGCCCAAGCTCAAGTCCGATGACGAGGACTCGAGGCCGCCACCGTAGTGCTGAAGCGT</b><br/> TGGGTCCCATAGAGTTCACGCTCAGCGGAGTAGCAAAGGAGGTGGGGCTCTCCCGCGCAGCGTTAATCCAGCGCTTC<br/> ACCAACCGCGATACGCTGCTGGTGAGGATGATGGAGCGCGCGTTCGAGCAGGTGCGGCATTACCTGAATGCGATACC<br/> GATAGGCGCAGGGCCGCAAGGGCTCTGGGAATTTTGCAGGTGCTCGTTCGAGCATGAACACTCGCAACGACTTCTC<br/> GGTGAACATCTCATCTCCTGGTACGAGCTCCAGGTGCCGGAGCTACGCACGCTTGCATCCAGCGGAACCGCGCGGT<br/> GGTGGAGGGGATCCGCAAGCGACTGCCCCAGGTGCTCCTGCGGCAGCTGAGTTGCTCCTGCACTCGGTATCGCTGG<br/> CGCGACGATGCAGTGGGCCGTCGATCCGGATGGTGAGCTAGCTGATCATGTGCTGGCTCAGATCGCTGCCATCCTGTG<br/> TTAATGTTTCCGAAACACGACGATTTCCAACCTCCAGGCACATGCGTAAACGGAGGTGTGCAGAGTCCCTGCGGCA<br/> GGCGACGAACACGACCGTCGTCGATTAGTACCGGTACGGTGGTGGTATCGAAGTCTTGATCACTGTACACTAGA</p> |
| pMLGFPK | <p>TGAGCAAAAGGCCAGCAAAAGGCCAGGAACCGTAAAAGGCCGCGTTGCTGGCGTTTTTCCATAGGCTCCGCCCCCT<br/> GACGAGCATCACAAAAATCGACGCTCAAGTCAGAGGTGGCGAAACCCGACAGGACTATAAAGATACCAGGCGTTTCCC<br/> CCTGGAAGCTCCCTCGTGCCTCTCCTGTTCCGACCCTGCCGTTACCGGATACCTGTCCGCTTTCTCCCTTCGGGAAGC<br/> GTGGCGTTTTCTCATAGCTCACGCTGTAGGTATCTCAGTTCGGTGTAGGTCGTTGCTCCAAGCTGGGCTGTGTGCAG<br/> AACCCCGTTCCAGCCCGACCGCTGCGCCTTATCCGGTAACTATCGTCTTGTAGTCCAACCCGGTAAGACACGACTTATCG<br/> CCACTGGCAGCAGCCACTGGTAACAGGATTAGCAGAGCGAGGTATGTAGGCGGTGCTACAGAGTTCTTGAAGTGGTG<br/> GCCTAACTACGGCTACACTAGAAGGACAGTATTTGGTATCTGCGCTCTGCTGAAGCCAGTTACCTTCGGAAAAAGAGTT<br/> GGTAGCTCTTGATCCGGCAAACAAACCACCGCTGGTAGCGGTGGTTTTTTTGTGCAAGCAGCAGATTACGCGCAGAA<br/> AAAAAGGATCTCAAGAAGATCCTTTGATCTTTTCTACGGGGTCTGACGCTCAGTGAACGAAAACCTCACGTTAAGGGAT<br/> TTTGGTCATGAGATTATCAAAAAGGATCTTACCTAGATCCTTTAAATTTAAATGAAGTTTTAAATCAATCTAAAGTAT<br/> ATATGAGTAACTTGGTCTGACAGTTACCAATGCTTAATCAGTGAGGCACCTATCTCAGCGATCTGTCTATTTTCGTTTCATC<br/> CATAGTTGCCTGACTCCCCGTCGTGTAGATAACTACGATACGGGAGGGCTTACCATCTGGCCCCAGTGCTGCAATGATA<br/> CCGCGAGACCCACGCTCACCGGCTCCAGATTTATCAGCAATAAACCAGCCAGCCGGAAGGGCCGAGCGCAGAAGTGGT<br/> CCTGCAACTTTATCCGCTCCATCCAGTCTATTAATTGTTGCCGGGAAGCTAGAGTAAGTAGTTCGCCAGTTAATAGTTT<br/> GCGCAACGTTGTTGCCATTGCTACAGGCATCGTGGTGTACGCTCGTCTTGGTATGGCTTCATTAGCTCCGGTCC<br/> AACGATCAAGGCGAGTTACATGATCCCCATGTTGTGCAAAAAGCGGTTAGCTCCTTCGGTCTCCGATCGTTGTCAG<br/> AAGTAAGTTGGCCGAGTGTATCACTCATGGTTATGGCAGCACTGCATAATTCTTACTGTCATGCCATCCGTAAGAT</p>                                                                                                                                                                                  |

|                  |                                                                                                                                                                                                                                                                                                                                                                                                                                                                                                                                                                                                                                                                                                                                                                                                                                                                                                                                                                                                                                                                                                                                                                                                                                                                                                                                                                                                                                                                                                                                                                                                                                                                                                                                                                                                                                                                                                                                                                                                                                                                                                                                                                                                                                                                                                                                                                                                                                                                                                                                                                                                                                                                                                                                                                                                                                                                                                                          |
|------------------|--------------------------------------------------------------------------------------------------------------------------------------------------------------------------------------------------------------------------------------------------------------------------------------------------------------------------------------------------------------------------------------------------------------------------------------------------------------------------------------------------------------------------------------------------------------------------------------------------------------------------------------------------------------------------------------------------------------------------------------------------------------------------------------------------------------------------------------------------------------------------------------------------------------------------------------------------------------------------------------------------------------------------------------------------------------------------------------------------------------------------------------------------------------------------------------------------------------------------------------------------------------------------------------------------------------------------------------------------------------------------------------------------------------------------------------------------------------------------------------------------------------------------------------------------------------------------------------------------------------------------------------------------------------------------------------------------------------------------------------------------------------------------------------------------------------------------------------------------------------------------------------------------------------------------------------------------------------------------------------------------------------------------------------------------------------------------------------------------------------------------------------------------------------------------------------------------------------------------------------------------------------------------------------------------------------------------------------------------------------------------------------------------------------------------------------------------------------------------------------------------------------------------------------------------------------------------------------------------------------------------------------------------------------------------------------------------------------------------------------------------------------------------------------------------------------------------------------------------------------------------------------------------------------------------|
|                  | <p>GCTTTTCTGTGACTGGTGAGTACTCAACCAAGTCATTCTGAGAATAGTGTATGCGGGCACCAGAGTTGCTCTTGCCCGGC<br/> GTCAACACGGGATAATAACCGCGCCACATAGCAGAACTTTAAAAGTGCTCATCATTGGAAAACGTTCTTCGGGGCGAAAA<br/> CTCTCAAGGATCTTACCGCTGTTGAGATCCAGTTCGATGTAACCCACTCGTGACCCAACTGATCTTCAGCATCTTTACT<br/> TTCACCAGCGTTTCTGGGTGAGCAAAAACAGGAAGGCAAAATGCCGCAAAAAGGGAATAAGGGGCGACACGGAATG<br/> TTGAATACTCATACTCTTCCTTTTTCAATATTATTGAAGCATTATCAGGGTTATTGTCTCATGAGCGGATACATATTTGA<br/> ATGATTTTAGAAAAATAACAAAAAGAGTTTGTAGAAACGCAAAAAGGCCATCCGTCAGGATGGCCTTCTGCTTAATTT<br/> GATGCCTGGCAGTTTATGGCGGGCGTCTGCCCGCCACCCTCCGGGCCGTTGCTTCGCAACGTTCAAATCCGCTCCCGG<br/> CGGATTTGTCCTACTCAGGAGAGCGTTCACCGACAAACAACAGATAAAACGAAAGGCCAGTCTTTCGACTGAGCCTTT<br/> CGTTTTATTTGATGCCTGGCAGTTCCTACTCTCGCATGGGGAGACCCACACTACCATCGGCGCTACGGCGTTTCACTT<br/> CTGAGTTCGGCATGGGGTCAGGTGGGACCACCGCGTACTGCCGCCAGGCAAATTCTGTTTTATCAGACCGCTTCTGCG<br/> TTCTGATTTAATCTGTATCAGGCTGAAAATCTTCTCTCATCCGCCAAAACAGCCAAGCTGGAGACCGTTAAACTCAATG<br/> ATGATGATGATGATGGTCGACGGCGCTATTAGATCCTTCTGAGATGAGTTTTTGTTCGGGCCAAGCTTATTTGTAG<br/> AGCTCATCCATGCCATGTGTAATCCAGCAGCAGTTACAAACTCAAGAAGGACCATGTGGTCACGCTTTTCGTTGGGAT<br/> CTTTCGAAAGGGCAGATTGTGTGCACAGGTAATGGTTGTCTGGTAAAAGGACAGGGCCATCGCCAATTGGAGTATTTT<br/> GTTGATAATGGTCTGCTAGTTGAACGGATCCATCTTCAATGTTGTGGCGAATTTTGAAGTTAGCTTTGATTCCATTCTTTT<br/> GTTTGTCTGCCGTGATGTATACATTGTGTGAGTTATAGTTGTAAGTTCGAGTTTGTGTCGAGAATGTTTCCATCTTCTTAA<br/> AATCAATACCTTTAACTCGATACGATTAACAAGGGTATCACCTTCAAACCTTGACTTCAGCACGCGTCTTGTAGTTCCCGT<br/> CATCTTTGAAAGATATAGTGCCTTCTGTACATAACCTTCGGGCATGGCACTCTTGAAAAAGTCATGCCGTTTCATATGA<br/> TCCGGATAACGGGAAAAGCATTGAACACCATAAGAGAAAAGTAGTGACAAGTGTGGCCATGGAACAGGTAGTTTTCCA<br/> GTAGTGCAAATAAATTTAAGGGTAAGTTTTCCGTATGTTGCATCACCTTACCCTCTCCACTGACAGAAAATTTGTGCC<br/> ATTAACATCACCATCTAATCAACAAGAATTGGGACAACCTCCAGTGAAAAGTTCTTCTCTTACTCATACTAGTTTCTCT<br/> CTGTTAGCCACCTAAATGTAACAGTCACGTCGGTTATATTCAATCCACACAACATACGAGCCGGAAGCATAAAAGTGT<br/> AAAGCCTGGGGTGCCTAATGAGTGAGCTAACTCACATTAATTGCGTTGCGCTCTAGAT<b>TGGTGCAAAACCTTTCGCGGTA</b><br/> <b>TGGCATGATAGCGCC</b>CCCCAACCCATACAGAAAGTGAACACTGATGCCCCGCCCAAGCTCAAGTCGATGACGAGGT<br/> ACTCGAGGCCGCCACCGTAGTGCTGAAGCGTTGCGGTCCCATAGAGTTCACGCTCAGCGGAGTAGCAAAGGAGGTGG<br/> GGCTCTCCCGCGCAGCGTTAATCCAGCGCTTACCAACCGCGATACGCTGCTGGTGAGGATGATGGAGCGCGGCGTCCG<br/> AGCAGGTGCGGCATTACCTGAATGCGATACCGATAGGCGCAGGGCCGCAAGGGCTCTGGGAATTTTTGCAGGTGCTCG<br/> TTCGGAGCATGAACACTCGCAACGACTTCTCGGTGAACTATCTCATCTCCTGGTACGAGCTCCAGGTGCCGGAGCTACG<br/> CACGCTTGCATCCAGCGGAACCGCGCGGTGGTGGAGGGGATCCGCAAGCGACTGCCCCAGGTGCTCCTGCGGCAG<br/> CTGAGTTGCTCCTGCACTCGGTTCATCGCTGGCGCGACGATGCAGTGGGCCGTCGATCCGGATGGTGAGCTAGCTGATC<br/> ATGTGCTGGCTCAGATCGCTGCCATCCTGTGTTAATGTTTCCCGAACACGACGATTTCCAACCTCCTCAGGCACATGCG<br/> TAAACGGAGGTGTGCAGAGTCCCTGCGGCAGGCGACGAACACGACCGTCGTCGATTAGG<b>T</b>ACCGGTACGGTTCGGTGG<br/> TATCGAAGTCTTGATCACTGTACACTAGAGGTAATACGGTTATCCACAGAATCAGGGGATAACGCAGGAAAGAACATG</p> |
| pMLGFPK_<br>M9C4 | <p>GGTAATACGTTATCCACAGAATCAGGGGATAACGCAGGAAAGAACATGTGAGCAAAAGGCCAGCAAAGGCCAGGA<br/> ACCGTAAAAAGGCCGCGTTGCTGGCGTTTTTCCATAGGCTCCGCCCCCTGACGAGCATCACAAAATCGACGCTCAAG<br/> TCAGAGGTGGCGAAACCCGACAGGACTATAAAGATACCAGGCGTTTTCCCCTGGAAGCTCCCTCGTGCCTCTCCTGTT</p>                                                                                                                                                                                                                                                                                                                                                                                                                                                                                                                                                                                                                                                                                                                                                                                                                                                                                                                                                                                                                                                                                                                                                                                                                                                                                                                                                                                                                                                                                                                                                                                                                                                                                                                                                                                                                                                                                                                                                                                                                                                                                                                                                                                                                                                                                                                                                                                                                                                                                                                                                                                                                                                                |

CCGACCTGCCGTTACCGGATACCTGTCCGCCTTCTCCCTTCGGGAAGCGTGGCGCTTTCATAGCTCACGCTGTAG  
GTATCTCAGTTCGGTGTAGGTCGTTCCGCTCCAAGCTGGGCTGTGTGCACGAACCCCCGTTACGCCGACCGCTGCGCC  
TTATCCGGTAACTATCGTCTTGAGTCCAACCCGGTAAGACACGACTTATCGCCACTGGCAGCAGCCACTGGTAACAGGA  
TTAGCAGAGCGAGGTATGTAGGCGGTGCTACAGAGTCTTGAAGTGGTGGCCTAACTACGGCTACACTAGAAGGACAG  
TATTTGGTATCTGCGCTCTGCTGAAGCCAGTTACCTTCGGAAAAAGAGTTGGTAGCTCTTGATCCGGCAAACAAACCAC  
CGCTGGTAGCGGTGGTTTTTTGTTTGAAGCAGCAGATTACGCGCAGAAAAAAGGATCTCAAGAAGATCCTTTGATC  
TTTTCTACGGGGTCTGACGCTCAGTGAACGAAAACCTCACGTTAAGGGATTTTGGTCATGAGATTATCAAAAAGGATCT  
TCACCTAGATCCTTTAAATTAATAATGAAGTTTTAAATCAATCTAAAGTATATATGAGTAACTTGGTCTGACAGTTACC  
AATGCTTAATCAGTGAGGCACCTATCTCAGCGATCTGTCTATTCGTTTCATCCATAGTTGCCTGACTCCCCGTCGTGTAGA  
TAACTACGATACGGGAGGGCTTACCATCTGGCCCCAGTGCTGCAATGATACCGCGAGACCCACGCTCACCGGCTCCAGA  
TTTATCAGCAATAAACAGCCAGCCGGAAGGGCCGAGCGCAGAAGTGGTCTGCAACTTTATCCGCCTCCATCCAGTCT  
ATTAATTGTTGCCGGGAAGCTAGAGTAAGTAGTTCGCCAGTTAATAGTTTGCGCAACGTTGTTGCCATTGCTACAGGCA  
TCGTGGTGTACGCTCGTCGTTTGGTATGGCTTCATTCAGCTCCGGTCCCAACGATCAAGGCGAGTTACATGATCCCC  
ATGTTGTCAAAAAAGCGGTTAGCTCCTTCGGTCTCCGATCGTTGTCAGAAGTAAGTTGGCCGAGTGTATCACTCAT  
GGTTATGGCAGCACTGCATAATTCTTACTGTCATGCCATCCGTAAGATGCTTTTCTGTGACTGGTGAGTACTCAACCA  
AGTCATTCTGAGAATAGTGTATGCGGCGACCGAGTTGCTCTTCCCCGGCGTCAACACGGGATAATACCGCGCCACATAG  
CAGAACTTTAAAAGTGCTCATCATTGAAAAACGTTCTTCGGGGCGAAAACTCTCAAGGATCTTACCGCTGTTGAGATCC  
AGTTCGATGTAACCCACTCGTGACCCAACTGATCTTCAGCATCTTTACTTTCACCAGCGTTTCTGGGTGAGCAAAAAC  
AGGAAGGCAAAATGCCGCAAAAAAGGGAATAAGGGCGACACGGAAATGTTGAATACTCATACTCTCCTTTTTCAATAT  
TATTGAAGCATTATCAGGGTTATTGTCTCATGAGCGGATACATATTTGAATGTATTTAGAAAAATAAACAAAAAGAGTT  
TGTAGAAACGCAAAAAAGGCCATCCGTCAGGATGGCCTTCTGCTTAATTTGATGCCTGGCAGTTTATGGCGGGCGTCCTG  
CCCGCCACCCTCCGGGCCGTTGCTTCGCAACGTTCAAATCCGCTCCCGGCGGATTTGTCCTACTCAGGAGAGCGTTACC  
GACAAACACAGATAAAACGAAAGGCCAGTCTTCGACTGAGCCTTTCGTTTTATTGATGCCTGGCAGTTCCCTACTC  
TCGCATGGGGAGACCCCACTACCATCGGCGCTACGGCGTTTCACTTCTGAGTTCCGCATGGGGTCAGGTGGGACCA  
CCGCGCTACTGCCGCCAGGCAAATTCTGTTTTATCAGACCGCTTCTGCGTTCTGATTAATCTGTATCAGGCTGAAAATCT  
TCTCTCATCCGCCAAAACAGCCAAGCTGGAGACCGTTTAACTCAATGATGATGATGATGGTGCACGGCGCTATTC  
AGATCCTCTTCTGAGATGAGTTTTTGTTCGGGCCAAGCTTATTTGTAGAGCTCATCCATGCCATGTGTAATCCAGCAG  
CAGTTACAACTCAAGAAGGACCATGTGGTCACGCTTTTCGTTGGGATCTTTCGAAAGGGCAGATTGTGTCGACAGGTA  
ATGGTTGTCTGGTAAAAGGACAGGGCCATCGCCAATTGGAGTATTTGTTGATAATGGTCTGCTAGTTGAACGGATCCA  
TCTTCAATGTTGTGGCGAATTTGAAGTTAGCTTTGATTCCATTCTTTTGTCTGCCGTGATGTATACATTGTGTGAG  
TTATAGTTGACTCGAGTTTGTGTCCGAGAATGTTTCCATCTTCTTAAATCAATACCTTTAACTCGATACGATTAACA  
AGGGTATCACCTTCAAACCTGACTTCAGCACGCGTCTGTAGTCCCGTCATCTTGAAGATATAGTGCCTCCTGTAC  
ATAACCTTCGGGCATGGCACTCTGAAAAAGTCATGCCGTTTCATATGATCCGGATAACGGGAAAAGCATTGAACACCA  
TAAGAGAAAAGTAGTGACAAGTGTGGCCATGGAACAGGTAGTTTTCCAGTAGTGCAAATAAATTAAGGGTAAGTTTTCT  
CGTATGTTGCATCACCTTACCCTCTCCACTGACAGAAAATTTGTGCCATTAACATCACCATCTAATTCAACAAGAATTG  
GGACAACTCCAGTAAAAAGTTCTTCTCCTTACTCATACTAGTTTCTCCTGTTAGCCACCTAAATGTAACAGTCACGTC

|                                        |                                                                                                                                                                                                                                                                                                                                                                                                                                                                                                                                                                                                                                                                                                                                                                                                                                                                                                                                                                                                                                                                                                                                                                                                                                                                                                                                                                                                                                                                                                                                                                                                                                                                                                                                                                                                                                                                                                                                                                                                                                                                                                                                                                           |
|----------------------------------------|---------------------------------------------------------------------------------------------------------------------------------------------------------------------------------------------------------------------------------------------------------------------------------------------------------------------------------------------------------------------------------------------------------------------------------------------------------------------------------------------------------------------------------------------------------------------------------------------------------------------------------------------------------------------------------------------------------------------------------------------------------------------------------------------------------------------------------------------------------------------------------------------------------------------------------------------------------------------------------------------------------------------------------------------------------------------------------------------------------------------------------------------------------------------------------------------------------------------------------------------------------------------------------------------------------------------------------------------------------------------------------------------------------------------------------------------------------------------------------------------------------------------------------------------------------------------------------------------------------------------------------------------------------------------------------------------------------------------------------------------------------------------------------------------------------------------------------------------------------------------------------------------------------------------------------------------------------------------------------------------------------------------------------------------------------------------------------------------------------------------------------------------------------------------------|
|                                        | <p>GGTTATATTCAATCCCACACAACATACGAGCCGGAAGCATAAAGTGTAAGCCTGGGGTGCCTAATGAGTGAGCTAAC<br/> TCACATTAATTGCGTTGCGCTCTAGATGGTGCAAAACCTTTTCGCGGTATGGCATGATAGCGCCCCACCCCATACAGA<br/> AGGTGAACACTGATGCCCCGCCCAAGCTCAAGTCCGATGACGAGGTAAGTCTGAGGCCGCCACCGTAGTGCTGAAGCGT<br/> TGGGTCCCATAGAGTTCACGCTCAGCGGAGTAGCAAAGGAGGTGGGACTCTCCCGCAGCGTTAATCCAGCGCTTC<br/> ACCAACCGGATACGCTGCTGGTGAGGATGATGGAGCGCGGCTCGAGCAGGTGCGGCATTACCTGAATGCGATACC<br/> GATAGGCGCAGGGCCGCAAGGGCTCTGGGAATTTTTGCAGGTGCTCGTTCGAGCATGAACACTCGCAACGACTTCTC<br/> GGTGAACATCTCATCTCTGGTACGAGCTCCAGGTGCCGGAGCTACGCACGCTTGGCATCCAGACTAACCAGCGCGGTG<br/> GTGGAGGGGATCCGCAATCGACTGCCCCAGGTGCTCCTGCGGCAGCTGAGTTGCTCCTGCACTCGGTTCATCACTGGC<br/> GCGACGATGCAGTGGGCCGTCGATCCGGATGGTGAGCTAGCTGATCATGTGCTGGCTCAGATCGCTGCCATCCTGTGT<br/> TTAATGTTTCCGAACAAGACGATTTCCAATCCTCCAGGCACATGCGTAAACGGAGGTGTGCAGAGTCCCTGCGGCAG<br/> GCGACGAACACGACCGTCTGATTAGGTACCGGTACGGTCCGGTGGTATCGAAGTCTTGATCACTGTACTACTAGA</p>                                                                                                                                                                                                                                                                                                                                                                                                                                                                                                                                                                                                                                                                                                                                                                                                                                                                                                                                                                                                                                                                                                                                                                                                                        |
| <p>pSense-<br/> M9C4-E7-<br/> MphA</p> | <p>GGTAATACGTTATCCACAGAATCAGGGGATAACGCAGGAAAGAACATGTGAGCAAAGGCCAGCAAAGGCCAGGA<br/> ACCGTAAAAAGGCCGCTTGTGCGTTTTTCCATAGGCTCCGCCCCCTGACGAGCATCACAAAAATCGACGCTCAAG<br/> TCAGAGGTGGCGAAACCCGACAGGACTATAAAGATAACAGGCGTTTTCCCTGGAAGCTCCCTCGTGCCTCTCTGTT<br/> CCGACCCTGCCGTTACCGGATACCTGTCCGCTTTCTCCCTTCGGGAAGCGTGGCGCTTTCTCATAGCTCACGCTGTAG<br/> GTATCTCAGTTCGGTGTAGGTCGTTCCGCTCAAGCTGGGCTGTGTGCACGAACCCCCGTTACGCCGACCGCTGCGCC<br/> TTATCCGGTAACATATCGTCTTGAGTCCAACCCGGTAAGACACGACTTATCGCCACTGGCAGCAGCCACTGGTAACAGGA<br/> TTAGCAGAGCGAGGTATGTAGGCGGTGCTACAGAGTCTTGAAGTGGTGCCTAACTACGGCTACACTAGAAGGACAG<br/> TATTTGGTATCTGCGCTCTGCTGAAGCCAGTTACCTTCGGAAAAGAGTTGGTAGCTCTTGATCCGGCAAACAAACCAC<br/> CGCTGGTAGCGGTGGTTTTTTGTTTGAAGCAGCAGATTACGCGCAGAAAAAAGGATCTCAAGAAGATCCTTTGATC<br/> TTTTCTACGGGGTCTGACGCTCAGTGAACGAAAACACTCACGTTAAGGGATTTTGGTCATGAGATTATCAAAAAGGATCT<br/> TCACCTAGATCCTTTAAATTAATAAATGAAGTTTTAAATCAATCTAAAGTATCCATGGATATGAGTAACTTGGTCTGAC<br/> AGTTACCAATGCTTAATCAGTGAGGCACCTATCTCAGCGATCTGTCTATTCGTTTCATCCATAGTTGCCTGACTCCCCGTC<br/> GTGTAGATAACTACGATACGGGAGGGCTTACCATCTGGCCCCAGTGTGCAATGATACCGCGAGACCCACGCTACCG<br/> GCTCCAGATTTATCAGCAATAAACCAGCCAGCCGGAAGGGCCGAGCGCAGAAGTGGTCTGCAACTTTATCCGCTCCA<br/> TCCAGTCTATTAATTGTTGCCGGGAAGCTAGAGTAAGTAGTTCGCCAGTTAATAGTTTGCGCAACGTTGTTGCCATTGCT<br/> ACAGGCATCGTGGTGTACGCTCGTCTGTTGGTATGGCTTCAATCAGCTCCGTTCCCAACGATCAAGGCGAGTTACAT<br/> GATCCCCATGTTGTGCAAAAAGCGGTTAGCTCCTTCGGTCTCCGATCGTTGTCAGAAGTAAGTTGGCCGAGTGT<br/> ATCACTCATGGTTATGGCAGCACTGCATAATTCTTACTGTCATGCCATCCGTAAGATGCTTTTCTGTGACTGGTGAAGT<br/> ACTCAACCAAGTCATTCTGAGAATAGTGTATGCGGCGACCGAGTTGCTCTTGCCCGCGTCAACACGGGATAATACCGC<br/> GCCACATAGCAGAACTTTAAAAGTGTCTCATCATTGGAAAACGTTCTTCGGGGCGAAAACACTCTCAAGGATCTTACCGCTG<br/> TTGAGATCCAGTTCGATGTAACCACTCGTGCACCAACTGATCTTCAGCATCTTTACTTTACCAGCGTTTCTGGGTGA<br/> GCAAAAACAGGAAGGCAAAATGCCGAAAAAAGGAATAAGGGCGACACGAAATGTTGAATACTCATACTCTTCCTT<br/> TTTCAATATTATTGAAGCATTTATCAGGGTTATTGTCTCATGAGCGGATACATATTTGAATGTATTGAAAAATAACA<br/> AAAAGAGCATGCGTTTGTAGAAACGAAAAAGGCCATCCGTCAGGATGGCCTTCTGCTTAATTTGATGCCTGGCAGTTT<br/> ATGGCGGGCGTCTGCCCGCCACCCTCCGGGCCGTTGCTTCGCAACGTTCAAATCCGCTCCCGGCGGATTTGTCTACTC</p> |

AGGAGAGCGTTCACCGACAAACAACAGATAAAAACGAAAGGCCAGTCTTTCGACTGAGCCTTTCGTTTTATTTGATGCC  
TGGCAGTTCCCTACTCTCGCATGGGGAGACCCACACTACCATCGGCGCTACGGCGTTTCACTTCTGAGTTCGGCATGG  
GGTCAGGTGGGACCACCGCGCTACTGCCGCCAGGCAAATTCTGTTTTATCAGACCGCTTCTGCGTTCTGATTTAATCTGT  
ATCAGGCTGAAAATCTTCTCTCATCCGCCAAAACAGCCAAGCTGGAGACCGTTTAAACGGGCCAAAGCTTTTTGTAGAG  
CTCATCCATGCCATGTGTAATCCCAGCAGCAGTTACAACTCAAGAAGGACCATGTGGTCACGCTTTTCGTTGGGATCTT  
TCGAAAGGACAGATTGTGTCGACAGGTAATGGTTGTCTGGTAAAAGGACAGGGCCATCGCCAATTGGAGTATTTTGT  
GATAATGGTCTGCTAGTTGAACGGAACCATCTTCAACGTTGTGGCGAATTTTGAAGTTAGCTTTGATTCCATTCTTTTGT  
TGTCTGCCGTGATGTATACATTGTGTGAGTTAAAGTTGACTCGAGTTTGTGTCCAAGAATGTTTCCATCTTCTTAAAT  
CAATACCTTTAACTCGATACGATTAACAAGGGTATCACCTTCAAACCTGACTTCAGCACGCGTCTTGTAGTCCCGTCA  
TCTTTGAAAGATATAGTGCCTTCTGTACATAACCTTCGGGCATGGCACTCTTGAAAAAGTCATGCCGTTTCATGTGATC  
CGGATAACGGGAAAAGCATTGAACACCATAGGTCAGAGTAGTGACAAGTGTGGCCACGGAACAGGTAGTTTTCCAGT  
AGTGCAAATAAATTTAAGGGTGAAGTTTTCCGTTTGTAGCATCACCTTACCCTCTCCACGGACAGAAAATTTGTGCCAT  
TAACATCACCATCTAATTCAACAAGAATTGGGACAACCTCAGTGAAAAGTTCTTCTCCTTGTCTACTAGTTTCTCCT  
GTTAGCCACCTAAATGTAACAGTCACGTCGGTTATATTCAATCCCACACAACATACGAGCCGGAAGCATAAAGTGTA  
AGCCTGGGGTGCCTAATGAGTGAGCTAACTCACATTAATTGCGTTGCGCTCTAGATGGTGCAAACCTTTCGGGTATG  
**GCATGATAGCGCCCCCAACCATACAGATGGTGAACACTGATGCCCCGCCCAAGCTCAAGTCGATGACGAGGTACT**  
CGAGGCCGCCACCGTAGTGCTGAAGCGTTGCGGTCCCATAGAGTTCACGCTCAGCGGAGTAGCAAAGGAGGTGGGAC  
TCTCCCGCGCAGCGTTAATCCAGCGCTTACCAACCGCGATACGCTGCTGGTGAGGATGATGGAGCGCGCGTTCGAGC  
AGGTGCGGCATTACCTGAATGCGATACCGATAGGCGCAGGGCCGAAGGGCTCTGGGAATTTTGCAGGTGCTCGTTC  
GGAGCATGAACACTCGCAACGACTTCTCGGTGAACTATCTCATCTCCTGGTACGAGCTCCAGGTGCCGGAGCTACGCAC  
GCTTGCATCCAGACTAACCAGCGCGGTGGTGGAGGGGATCCGCAATCGACTGCCCCAGGTGCTCCTGCGGCAGCTGA  
GTTGCTCCTGCACTCGGTCACTACTGGCGGACGATGCAGTGGGCCGTCGATCCGGATGGTGAAGTACTGATCATGT  
GCTGGCTCAGATCGCTGCCATCCTGTGTTAATGTTTCCGAACAAGACGATTTCCAACCTCCTCAGGCACATGCGTAAC  
ATAGTATCCAAAATCTAAACCCGTCAGCCCTCAGGAGTGAATCATGACCGTAGTCACGACCGCCGATACCTCCAACT  
GTACGCACTTGACGCCCCGACATGGGCTCAAGCTCCATGGCCCGTACTGTCAATGAGCTTGGGCTCGACTATAGGATC  
GTGATCGCCACCGTCGACGATGGACGTCGGTGGTGTGCGCATCCCGCGCCGAGCCGAGGTAAGCGGAAGGTCGA  
ACCAGAGGCGCGGGTGTGGCAATGCTCAAGAATCGCCTGCCGTTCCGCGGTGCCGGACTGGCGCGTGGCCAACGCCG  
AGCTCGTTGCCTATCCCATGCTCGAAGACTCGACTGCGATGGTCATCCAGCCTGGTTCGTCCACGCCCCGACTGGGTCTG  
GCCGAGGACTCGGAGGTCTTCGCGGAGAGCTTCGCGACCGCGCTCGCCGCCCTGCATGCCGTCCCCATTTCCGCCGCC  
GTGGATGCGGGGATGCTCATCCGTACACCGACGAGCCCGTCAGAAGGTGGCCGACGACGTTGACCGCGTCCGACG  
CGAGTTCGTGGTGAACGACAAGCGCCTCACCAGGTGGCAGCGCTGGCTCGACGACGATTCGTCTGGCCAGATTTCTC  
CGTGGTGGTGCATGGCGATCTCTACGTGGCCATGTGCTCATCGACAACACGGAGCGCGTCAGCGGGATGATCGACTG  
GAGCGAGGCCCGCGTTGATGACCCTGCCATCGACATGGCCGCGCACCTTATGGTCTTTGGTGAAGAGGGGCTCGCGAA  
GCTCCTCCTACGTATGAAGCGGCCGGTGGCCGGGTGTGGCCGCGCTCGCCACCACATCGCGGAGCGCCTTGCCTT  
CGGGGCGGTACCTACGCACTCTTCGCCCTCGACTCGGGTAACGAAGAGTACCTCGCTGCGGCGAAGGCGCAGCTCGC



|                    |                                                                                                                                                                                                                                                                                                                                                                                                                                                                                                                                                                                                                                                                                                                                                                                                                                                                                                                                                                                                                                                                                                                                                                                                                                                                                                                                                                                                                                                                                                                                                                                                                                                                                                                                                                                                                                                                                                                                                                                                                                                                                                                                                                                                                                                                                                                                                                                                                                                                                                                                                                                                                                                                                                                                                                                                                                                                                                    |
|--------------------|----------------------------------------------------------------------------------------------------------------------------------------------------------------------------------------------------------------------------------------------------------------------------------------------------------------------------------------------------------------------------------------------------------------------------------------------------------------------------------------------------------------------------------------------------------------------------------------------------------------------------------------------------------------------------------------------------------------------------------------------------------------------------------------------------------------------------------------------------------------------------------------------------------------------------------------------------------------------------------------------------------------------------------------------------------------------------------------------------------------------------------------------------------------------------------------------------------------------------------------------------------------------------------------------------------------------------------------------------------------------------------------------------------------------------------------------------------------------------------------------------------------------------------------------------------------------------------------------------------------------------------------------------------------------------------------------------------------------------------------------------------------------------------------------------------------------------------------------------------------------------------------------------------------------------------------------------------------------------------------------------------------------------------------------------------------------------------------------------------------------------------------------------------------------------------------------------------------------------------------------------------------------------------------------------------------------------------------------------------------------------------------------------------------------------------------------------------------------------------------------------------------------------------------------------------------------------------------------------------------------------------------------------------------------------------------------------------------------------------------------------------------------------------------------------------------------------------------------------------------------------------------------------|
|                    | CGCAGCGGAATGAGGTGTGCAGAGTCCCTGCGGCAGGCGACGAACACGACCGTCGTCGATTAGTACCGGTACGGTTCG<br>GTGGTATCGAAGTCTTGATCACTGTACTAGTA                                                                                                                                                                                                                                                                                                                                                                                                                                                                                                                                                                                                                                                                                                                                                                                                                                                                                                                                                                                                                                                                                                                                                                                                                                                                                                                                                                                                                                                                                                                                                                                                                                                                                                                                                                                                                                                                                                                                                                                                                                                                                                                                                                                                                                                                                                                                                                                                                                                                                                                                                                                                                                                                                                                                                                                 |
| pCOLADuet<br>-EryG | AAGTCGAACAGAAAAGTAATCGTATTGTACACGGCCGCATAATCGAAATTAATACGACTCACTATAGGGGAATTGTGAGC<br>GGATAACAATTCCCATCTTAGTATATTAGTTAAGTATAAGAAGGAGATATACATATGGCAGATCTCAATTGGATATCG<br>GCCGGCCACGCGATCGCTGACGTCCGTACCCTCGAGTCTGGTAAAGAAACCGCTGCTGCGAAATTTGAACGCCAGCAC<br>ATGGACTCGTCTACTAGCGCAGCTTAATTAACCTAGGCTGCTGCCACCGCTGAGCAATAACTAGCATAACCCCTTGGGG<br>CCTCTAAACGGGTCTTGAGGGGTTTTTGTGAAACCTCAGGCATTTGAGAAGCACACGGTCACACTGCTTCCGGTAGT<br>CAATAAACCGGTAAACCAGCAATAGACATAAGCGGCTATTTAACGACCCTGCCCTGAACCGACGACAAGCTGACGACC<br>GGGTCTCCGCAAGTGGCACTTTTCGGGGAAATGTGCGCGGAACCCCTATTTGTTATTTTTCTAAATACATTCAAATATG<br>TATCCGCTCATGAATTAATTCTTAGAAAACTCATCGAGCATCAAATGAAACTGCAATTTATTCATATCAGGATTATCAAT<br>ACCATATTTTTGAAAAAGCCGTTTCTGTAATGAAGGAGAAAACTCACCGAGGCAGTTCCATAGGATGGCAAGATCCTGG<br>TATCGGTCTGCGATTCCGACTCGTCCAACATCAATACAACCTATTAATTTCCCCTCGTCAAAAAATAAGTTATCAAGTGA<br>GAAATCACCATGAGTGACGACTGAATCCGGTGAGAATGGCAAAAGTTTATGCATTTCTTCCAGACTTGTTCAACAGGC<br>CAGCCATTACGCTCGTCATCAAAATCACTCGCATCAACCAACCGTTATTCATTCTGATTGCGCCTGAGCGAGACGAAA<br>TACGCGGTCTGCTGTTAAAAGGACAATTACAAACAGGAATCGAATGCAACCGGCGCAGGAACACTGCCAGCGCATCAAC<br>AATATTTTACCTGAATCAGGATATTCTTAATACCTGGAATGCTGTTTTCCGGGGATCGCAGTGGTGAGTAACCATG<br>CATCATCAGGAGTACGGATAAAATGCTTGATGGTCGGAAGAGGCATAAATTCGTCAGCCAGTTTAGTCTGACCATCTC<br>ATCTGTAACATCATTGGCAACGCTACCTTTGCCATGTTTCAGAAACAACTCTGGCGCATCGGGCTTCCATACAATCGAT<br>AGATTGTCGCACCTGATTGCCCGACATTATCGCGAGCCATTTATACCCATATAAATCAGCATCCATGTTGGAATTTAAT<br>CGCGGCCTAGAGCAAGACGTTTCCCGTTGAATATGGCTCATACTCTTCTTTTTCAATATTATTGAAGCATTATCAGGGT<br>TATTGTCTCATGAGCGGATACATATTTGAATGTATTTAGAAAAATAACAAATAGGCATGCTAGCGCAGAAACGTCCTA<br>GAAGATGCCAGGAGGATACTTAGCAGAGAGACAATAAGGCCGGAGCGAAGCCGTTTTTCCATAGGCTCCGCCCCCTG<br>ACGAACATCACGAAATCTGACGCTCAAATCAGTGGTGGCGAAACCCGACAGGACTATAAAGATACCAGGCGTTTCCCC<br>TGATGGCTCCCTCTTGCCTCTCTGTTCCCGTCTGCGGCGTCCGTGTTGTGGTGGAGGCTTTACCCAAATCACACGT<br>CCCGTTCCGTGTAGACAGTTCCGCTCCAAGCTGGGCTGTGTGCAAGAACCCCCGTTCCAGCCGACTGCTGCGCCTTATCC<br>GGTAACTATCATCTTGAGTCCAACCCGAAAGACACGACAAAACGCCACTGGCAGCAGCCATTGGTAACTGAGAATTA<br>GTGGATTTAGATATCGAGAGTCTTGAAGTGGTGGCCTAACAGAGGCTACACTGAAAGGACAGTATTTGGTATCTGCGC<br>TCCACTAAAGCCAGTTACCAGGTTAAGCAGTCCCAACTGACTTAACCTTCGATCAAACCGCCTCCCCAGGCGGTTTTT<br>TCGTTTACAGAGCAGGAGATTACGACGATCGTAAAAGGATCTCAAGAAGATCCTTTACGGATTCCCAGACCATCACTC<br>TAGATTTAGTGAATTTATCTCTTCAAATGTAGCACCTGAAGTCAGCCCCATACGATATAAGTTGTAATTCTCATGTTAG<br>TCATGCCCCGCGCCACCGGAAGGAGCTGACTGGGTTGAAGGCTCTCAAGGCATCGGTGAGATCCCGGTGCCTAAT<br>GAGTGAGCTAACTTACATTAATTGCGTTGCGCTCACTGCCCGCTTCCAGTCGGGAAACCTGCTGTCGAGCTGCATTAA<br>TGAATCGGCCAACGCGCGGGGAGAGGCGGTTTGCCTATTGGGCGCCAGGGTGGTTTTTCTTTTACCAGTGAGACGGG<br>CAACAGCTGATTGCCCTTACCAGCTGGCCCTGAGAGAGTTGAGCAAGCGGTCCACGCTGGTTTGGCCAGCAGGCG<br>AAAATCCTGTTTGATGGTGGTTAACGGCGGGATATAACATGAGCTGTCTTCGGTATCGTCGTATCCCACTACCGAGATG<br>TCCGCACCAACGCGCAGCCCGGACTCGGTAATGGCGCGCATTGCGCCAGCGCCATCTGATCGTTGGCAACCAGCATC |

|                                             |                                                                                                                                                                                                                                                                                                                                                                                                                                                                                                                                                                                                                                                                                                                                                                                                                                                                                                                                                                                                                                                                                                                                                                                                                                                                                                                                                                                                                                                                                                                                                                                                                                                                                                                                                                                                                                                                                                                                                                                                                                                                                                                                                                         |
|---------------------------------------------|-------------------------------------------------------------------------------------------------------------------------------------------------------------------------------------------------------------------------------------------------------------------------------------------------------------------------------------------------------------------------------------------------------------------------------------------------------------------------------------------------------------------------------------------------------------------------------------------------------------------------------------------------------------------------------------------------------------------------------------------------------------------------------------------------------------------------------------------------------------------------------------------------------------------------------------------------------------------------------------------------------------------------------------------------------------------------------------------------------------------------------------------------------------------------------------------------------------------------------------------------------------------------------------------------------------------------------------------------------------------------------------------------------------------------------------------------------------------------------------------------------------------------------------------------------------------------------------------------------------------------------------------------------------------------------------------------------------------------------------------------------------------------------------------------------------------------------------------------------------------------------------------------------------------------------------------------------------------------------------------------------------------------------------------------------------------------------------------------------------------------------------------------------------------------|
|                                             | <p>GCAGTGGGAACGATGCCCTCATTAGCATTGTCATGGTTTGTGAAAACCGGACATGGCACTCCAGTCGCCTTCCCGTTC<br/> CGCTATCGGCTGAATTTGATTGCGAGTGAGATATTTATGCCAGCCAGCCAGACGCAGACGCGCCGAGACAGAACTTAA<br/> TGGGCCCGCTAACAGCGCGATTTGCTGGTGACCAATGCGACCAGATGCTCCACGCCAGTCGCGTACCGTCTTCATGG<br/> GAGAAAATAAATACTGTTGATGGGTGTCTGGTCAGAGACATCAAGAAATAACGCCGGAACATTAGTGCAGGCAGCTTCC<br/> ACAGCAATGGCATCCTGGTCATCCAGCGGATAGTTAATGATCAGCCCACTGACGCGTTGCGCGAGAAGATTGTGCACC<br/> GCCGCTTTACAGGCTTCGACGCGCTTCGTTCTACCATCGACACCACCAGCTGGCACCCAGTTGATCGGCGGAGATTT<br/> AATCGCCGCGACAATTTGCGACGGCGCGTGCAGGGCCAGACTGGAGGTGGCAACGCCAATCAGCAACGACTGTTTGGC<br/> CGCCAGTTGTTGTGCCACGCGGTTGGGAATGTAATTCAGCTCCGCCATCGCCGCTTCCACTTTTTCCCGCGTTTTCGCAG<br/> AAACGTGGTGGCTGGCTCACCACGCGGAAACGGTCTGATAAGAGACACCGGCATACTCTGCGACATCGTATAACG<br/> TTACTGGTTTACATTCACCACCCTGAATTGACTCTTCCGGGCGCTATCATGCCATACCGGAAAGGTTTTGCGCCATT<br/> CGATGGTGTCCGGGATCTCGACGCTCTCCCTATGCGACTCTGCATTAGGAAAT<b>TAATACGACTCACTATAGGGGAAT</b><br/> TGTGAGCGGATAACAATTCCTGTAGAAATAATTTGTTAACTTTAATAAGGAGATATAACCATGGGCAGCAGCCATC<br/> ATCATCATCATCACAGCAGCGGCCTGGTGCCGCGCGGCAGCCATATGAGCGTGAAGCAGAAGTCAGCGTTGCAGGACC<br/> TGGTCGACTTCGCAAGTGGCACGTGTGGACCAGGGTGCAGCCGTCAGCCGTGCGCGCCTGGCCTACGAGCTGTTCCG<br/> CCGACGACCACGAGGCCACGACCGAGGGCGCCTACATCAACCTCGGCTACTGGAAGCCCGGGTGCAGCCGGCCTGGAG<br/> GAGGCCAACAGGAGCTGGCGAACAGCTCGCCGAGGCCGCGGGGATCAGCGAGGGCGACGAGGTGCTCGACGTGCG<br/> GGTTCGGGCTCGGCGCGCAGGACTTCTTGGCTCGAGACGCGCAAGCCGGCCAGGATCGTCGGCGTCGACCTGACCC<br/> CGAGCCACGTCCGCATCGCCTCCGAGCGCGGAGCGCGAGAACGTGCAGGACCGCCTGCAGTTCAAGGAGGGCTCG<br/> GCGACCGACCTGCCCTTCGGCGCGGAGACCTTCAGCCGCGTACCTCCCTGGAGTCGGCCCTGACTACGAGCCGCGG<br/> ACCGACTTCTCAAGGGCGCGTTCGAGGTGCTCAAGCCCGAGGCGTGTGGCCATCGGCGACATCATCCCGCTCGAC<br/> CTGCGCGAGCCCGTTCCGACGGACCGCCGAAGCTGGCGCCGACGCGTGGGATCGCTGTCCGGCGGCATCCCGGT<br/> GGAGAACTGGGTGCCCCGCGAGACCTACGCCAAGCAGCTCCGCGAAGCGGGCTTCGTCGACGTGAGGTGAAGTCGG<br/> TCCGCGACAACGTGATGGAGCCCTGGCTGGACTACTGGCTGCGCAAGCTGCAGGACGAGTCGTTCAAGAAGAGCGTG<br/> AGCAGGCTCTTACAGCCAGGTCAAGCGGTGCTGACCAGCGACTCGGGCATGAAGGGCGAGCTGCCCGCGCTCGAC<br/> TTCGTGATCGCCTCAGCCCGAAGCCCGGCGCGTGGGATCCGAATTCGAGCTCCGTGACAAGCTTGCGGCCGCATAAT<br/> GCTT</p> |
| <p>pSense-<br/> M9C4-E7-<br/> MphA-EryG</p> | <p>TAAAGATACCAGGCGTTTCCCCCTGGAAGCTCCCTCGTGCGCTCTCCTGTTCCGACCCTGCCGCTTACCGGATACCTGTC<br/> CGCCTTTCTCCCTTCGGGAAGCGTGGCGCTTCTCATAGCTCACGCTGTAGGTATCTCAGTTCGGTGTAGGTGTTTCGCT<br/> CCAAGCTGGGCTGTGTGCACGAACCCCCGTTACGCCGACCGCTGCGCCTTATCCGGTAACTATCGTCTTGAGTCCAAC<br/> CCGGTAAGACACGACTTATCGCCACTGGCAGCAGCCACTGGTAACAGGATTAGCAGAGCGAGGTATGTAGGCGGTGCT<br/> ACAGAGTTCTTGAAGTGGTGGCCTAACTACGGCTACACTAGAAGGACAGTATTTGGTATCTGCGCTCTGCTGAAGCCAG<br/> TTACCTTCGGAAAAAGAGTTGGTAGCTCTGATCCGGCAAACAAACCACCGCTGGTAGCGGTGGTTTTTTTTGTTTCAA<br/> GCAGCAGATTACGCGCAGAAAAAAGGATCTCAAGAAGATCCTTTGATCTTTTCTACGGGGTCTGACGCTCAGTGGAAC<br/> GAAAACCTACGTTAAGGGATTTTGGTCATGAGATTACAAAAAGGATCTTACCTAGATCCTTTAAATTAATAAATGAAG<br/> TTTTAAATCAATCTAAAGTATCCATGGATATGAGTAACTTGGTCTGACAGTTACCAATGCTTAATCAGTGAGGCACCTA<br/> TCTCAGCGATCTGTCTATTTGTTTCATCCATAGTTGCCTGACTCCCCGTCGTGTAGATAACTACGATACGGGAGGGCTTA</p>                                                                                                                                                                                                                                                                                                                                                                                                                                                                                                                                                                                                                                                                                                                                                                                                                                                                                                                                                                                                                                                                                                                                                                                                                                                                                        |

CCATCTGGCCCCAGTGCTGCAATGATACCGCGAGACCCACGCTCACCGGCTCCAGATTTATCAGCAATAAACCAGCCAG  
CCGGAAGGGCCGAGCGCAGAAGTGGTCTGCAACTTTATCCGCCTCCATCCAGTCTATTAATTGTTGCCGGAAGCTAG  
AGTAAGTAGTTCGCCAGTTAATAGTTTGCACAACGTTGTTGCCATTGCTACAGGCATCGTGGTGTACGCTCGTCTTTG  
GTATGGCTTCATTCAGCTCCGTTCCCAACGATCAAGGCGAGTTACATGATCCCCATGTTGTGCAAAAAAGCGGTTAG  
CTCCTTCGGTCTCCGATCGTTGTCAGAAGTAAGTTGGCCGAGTGTATCACTCATGGTTATGGCAGCACTGCATAATT  
CTCTTACTGTCATGCCATCCGTAAGATGCTTTTCTGTGACTGGTGAGTACTCAACCAAGTCACTTCTGAGAATAGTGTATG  
CGGCGACCGAGTTGCTCTTGCCCGGCGTCAACACGGGATAATACCGCGCCACATAGCAGAAGTTTAAAAAGTGTCTATCA  
TTGGAAAACGTTCTTCGGGGCGAAAAGTCTCAAGGATCTTACCGCTGTTGAGATCCAGTTCGATGTAACCCACTCGTGC  
ACCCAAGTATCTTCAGCATCTTTTACTTTCACCAGCGTTTCTGGGTGAGCAAAAACAGGAAGGCAAAAATGCCGAAAA  
AAGGGAATAAGGGCGACACGGAAATGTTGAATACTCATACTTCTCTTTTCAATATTATTGAAGCATTATCAGGGTTA  
TTGTCTCATGAGCGGATACATATTTGAATGATTTAGAAAAATAACAAAAAGAGCATGCGTTTGTAGAAAACGAAAAA  
GGCCATCCGTCAGGATGGCCTTCTGCTTAATTTGATGCCTGGCAGTTTATGGCGGGCGTCTGCCCGCCACCCTCCGGG  
CCGTTGCTTCGCAACGTTCAAATCCGCTCCCGGCGGATTTGCTCTACTCAGGAGAGCGTTCACCGACAAAACAACAGATA  
AAACGAAAGGCCAGTCTTTCGACTGAGCCTTTCGTTTTATTTGATGCCTGGCAGTTCCTACTCTCGCATGGGGAGACC  
CCACTACTACATCGGCGCTACGGCGTTTCACTTCTGAGTTCGGCATGGGGTCCAGGTGGGACCACCGCGCTACTGCCGCC  
AGGCAAATTCTGTTTTATCAGACCGTCTGCGTTCTGATTTAATCTGTATCAGGCTGAAAATCTTCTCTCATCCGCCAAA  
ACAGCCAAGCTGGAGACCGTTTAAACGGGCCCAAGCTTTTTGTAGAGCTCATCCATGCCATGTGTAATCCAGCAGCAG  
TTACAAACTCAAGAAGGACCATGTGGTCACGCTTTCGTTGGGATCTTTCGAAAGGACAGATTGTGTCGACAGGTAATG  
GTTGTCTGGTAAAAGGACAGGGCCATCGCAATTGGAGTATTTTGTGATAATGGTCTGCTAGTTGAACGGAACCATCT  
TCAACGTTGTGGCGAATTTTGAAGTTAGCTTTGATTCCATTCTTTGTTTGTCTGCCGTGATGTATACATTGTGTGAGTTA  
AAGTTGACTCGAGTTTGTGTCCAAGAATGTTTCCATCTCTTTAAAATCAATACCCTTAACTCGATACGATTAACAAGG  
GTATCACCTTCAAAGTCTGACTTCAGCACGCGTCTTGTAGGTCCCCTCATCTTTGAAAGATATAGTGCCTTCTGTACATAA  
CCTTCGGGCATGGCACTCTTGAAAAGTCAAGTCCGTTTTCATGTGATCCGGATAACGGGAAAAGCATTGAACACCATAGG  
TCAGAGTAGTGACAAGTGTGGCCACGGAACAGGTAGTTTTCCAGTAGTGCAAATAAATTTAAGGGTGAAGTTTCCGTT  
TGTAGCATCACCTTACCCTCTCCACGGACAGAAAATTTGTGCCATTAACATCACCATCTAATTCAACAAGAATTGGGA  
CAACTCCAGTGAAAAGTCTTCTCCTTTGCTCATACTAGTTTCTCTGTTAGCCACCTAAATGTAACAGTCACGTCGGT  
TATATTCAATCCACACAACATACGAGCCGGAAGCATAAAGTGTAAAGCCTGGGGTGCCTAATGAGTGAGCTAACTCAC  
ATTAATTGCGTTGCGCTCTAGAT**TGGTGCAAACCTTTCGCGGTATGGCATGATAGCGCCCCCAACCATAACAGATGGT**  
GAACACTGATGCCCCGCCCAAGCTCAAGTCCGATGACGAGGACTCGAGGCCGCCACCGTAGTGCTGAAGCGTTGCG  
GTCCCATAGAGTTCACGCTCAGCGGAGTAGCAAAGGAGGTGGGACTCTCCCGCGCAGCGTTAATCCAGCGCTTACCA  
ACCGCGATACGCTGCTGGTGAGGATGATGGAGCGCGGCGTTCGAGCAGGTGCGGCATTACCTGAATGCGATACCGATA  
GGCGCAGGGCCGCAAGGGCTCTGGGAATTTTGCAGGTGCTCGTTTCGGAGCATGAACACTCGCAACGACTTCTCGGTG  
AACTATCTCATCTCCTGGTACGAGCTCCAGGTGCCGGAGCTACGCACGCTTTCGATCCAGACTAACCGCGCGGTGGTGG  
AGGGGATCCGCAATCGACTGCCCCAGGTGCTCCTGCGGCAGCTGAGTTGCTCCTGCACTCGGTTCATCACTGGCGCGAC  
GATGCAGTGGGCGTTCGATCCGGATGGTGAGCTAGCTGATCATGTGCTGGCTCAGATCGCTGCCATCCTGTGTTAATG  
TTTCCGAACAAGACGATTTCCAAGTCTCCAGGCACATGCGTAACATAGTATCCAAAATCTAAACCCGTCAAGCCCTCA

|          |                                                                                                                                                                                                                                                                                                                                                                                                                                                                                                                                                                                                                                                                                                                                                                                                                                                                                                                                                                                                                                                                                                                                                                                                                                                                                                                                                                                                                                                                                                                                                                                                                                                                                                                                                                                                                                                                                                                                                                                                                                                                                                                                                                                                                                                                                                                                                                                                                                                                                                                                                                                                                                                                                                                                               |
|----------|-----------------------------------------------------------------------------------------------------------------------------------------------------------------------------------------------------------------------------------------------------------------------------------------------------------------------------------------------------------------------------------------------------------------------------------------------------------------------------------------------------------------------------------------------------------------------------------------------------------------------------------------------------------------------------------------------------------------------------------------------------------------------------------------------------------------------------------------------------------------------------------------------------------------------------------------------------------------------------------------------------------------------------------------------------------------------------------------------------------------------------------------------------------------------------------------------------------------------------------------------------------------------------------------------------------------------------------------------------------------------------------------------------------------------------------------------------------------------------------------------------------------------------------------------------------------------------------------------------------------------------------------------------------------------------------------------------------------------------------------------------------------------------------------------------------------------------------------------------------------------------------------------------------------------------------------------------------------------------------------------------------------------------------------------------------------------------------------------------------------------------------------------------------------------------------------------------------------------------------------------------------------------------------------------------------------------------------------------------------------------------------------------------------------------------------------------------------------------------------------------------------------------------------------------------------------------------------------------------------------------------------------------------------------------------------------------------------------------------------------------|
|          | <p>GGAGTGAATCATGACCGTAGTCACGACCGCCGATACCTCCCAACTGTACGCACCTTGACGCCCCGACATGGGCTCAAGCTC<br/> CATGGCCCGCTGACTGTCAATGAGCTTGGGCTCGACTATAGGATCGTGATCGCCACCGTCGACGATGGACGTCGGTGG<br/> GTGCTGCGCATCCCGCGCCGAGCCGAGGTAAGCGCGAAGGTGAACCGAGAGGCGCGGGTGGTGGCAATGCTCAAGAA<br/> TCGCTGCCGTTCCGGTGGCCGACTGGCGCGTGGCCAACGCCGAGCTCGTTGCCTATCCCATGCTCGAAGACTCGACT<br/> GCGATGGTCATCCAGCCTGGTTCGTCCACGCCGACTGGGTCGTGCCGAGGACTCGGAGGTCTTCGCGGAGAGCTTC<br/> GCGACCGCGCTCGCCGCCCTGCATGCCGTCCCATTTCGCCGCCGTGGATGCGGGGATGCTCATCCGTACACCGACGC<br/> AGGCCCGTCAGAAGGTGGCCGACGACGTTGACCGCGTCCGACGCGAGTTCGTGGTGAACGACAAGCGCCTCCACCGG<br/> TGGCAGCGCTGGCTCGACGACGATTCGTGCGTGGCCAGATTTCTCCGTGGTGGTGCATGGCGATCTCTACGTGGGCCAT<br/> GTGCTCATCGACAACACGGAGCGCGTCAGCGGGATGATCGACTGGAGCGAGGCCCGCGTTGATGACCCTGCCATCGAC<br/> ATGGCCGCGCACCTTATGGTCTTTGGTGAAGAGGGGCTCGCGAAGCTCCTCCTACGTATGAAGCGGCCGGTGGCCGG<br/> GTGTGGCCGCGGCTCGCCACCACATCGCGGAGCGCCTTGCGTTGGGGCGGTACCTACGCACTTTCGCCCTCGACT<br/> CGGGTAACGAAGAGTACCTCGCTGCGGCGAAGGCGCAGCTCGCCGACGCGAATGAGGTGTGCAGAGTCCCTGCGGC<br/> AGGCGACGAACACGACCGTCGTGATTAGTACCCGCGAAATTAATACGACTCACTATAGGGGAATTGTGAGCGGATAA<br/> CAATTCCTCTAGAAATAATTTGTTAACTTTAAGAAGGAGATATACCATGGGCAGCAGCCATCATCATCATCAC<br/> AGCAGCGGCCTGGTGCCGCGCGGCAGCCATATGAGCGTGAAGCAGAAGTCAGCGTTGCAGGACCTGGTCGACTTCGC<br/> CAAGTGGCACGTGTGGACCAGGGTGGCGCCGTCCAGCCGTGCGCGCCTGGCCTACGAGCTGTTCCGCCGACGACCACGA<br/> GGCCACGACCGAGGGCGCCTACATCAACCTCGGCTACTGGAAGCCCGGGTGGCGCCGCTGGAGGAGGCCAACCAGG<br/> AGCTGGCGAACCAGCTCGCCGAGGCCGCGGGGATCAGCGAGGGCGACGAGGTGCTCGACGTCGGGTTCCGGCTCGG<br/> CGCGCAGGACTTCTTGGCTCGAGACGCGCAAGCCGGCCAGGATCGTCGGCGTCGACCTGACCCGAGCCACGTCCG<br/> CATCGCTCCGAGCGCGCGGAGCGCGAGAACGTGCAGGACCGCCTGCAGTTCAAGGAGGGCTCGGCGACCGACCTGC<br/> CCTTCGGCGCGGAGACCTTCGACCGCGTCACCTCCCTGGAGTCGGCCCTGCACTACGAGCCGCGGACCGACTTCTCAA<br/> GGGCGCGTTGAGGTGCTCAAGCCCGGAGGCGTGCTGGCCATCGGCGACATCATCCCGCTCGACCTGCGCGAGCCCGG<br/> TTCCGACGGACCGCCGAAGCTGGCGCCGACGCGTCCGGATCGCTGTCCGGCGGCATCCCGGTGGAGAACTGGGTGC<br/> CCCGCGAGACCTACGCCAAGCAGCTCCGCGAAGCGGGCTTCGTGACGTCGAGGTGAAGTCGGTCCGCGACAACGTG<br/> ATGGAGCCCTGGCTGGACTACTGGCTGCGCAAGCTGCAGGACGAGTCGTTCAAGAAGAGCGTGAGCAGGCTCTTCTAC<br/> AGCCAGGTCAAGCGTTCGCTGACCAGCGACTCGGGCATGAAGGGCGAGCTGCCCGCGCTCGACTTCGTGATCGCTCA<br/> GCCCGCAAGCCCGGCGGTAGGGATCCGAATTCGAGCTCCGTGACAAGCTTGCAGCCGCACTCGAGCACCACCACCA<br/> CCACCACTGAGATCCGGCTGCTAACAAGCCCGAAAGGAAGCTGAGTTGGCTGCTGCCACCCTGAGCAATAACTAGC<br/> ATAACCCCTGGGGCCTCTAACGGGTCTGAGGGTTTTTGTGAAAGGAGGAACTATATCCGGATTGGGGTACCTA<br/> CGTTCGGTGGTATCGAAGTCTTGATCACTGTACACTAGAGGTAATACGGTTATCCACAGAATCAGGGGATAACGCAGG<br/> AAAGAACATGTGAGCAAAAGGCCAGCAAAAGGCCAGGAACCGTAAAAAGGCCGCGTTGCTGGCGTTTTTCCATAGGCT<br/> CCGCCCCCTGACGAGCATCAAAAATCGACGCTCAAGTCAGAGGTGGCGAAACCCGACAGGACTA</p> |
| pSense-1 | <p>ATAACGCAGGAAAGAACATGTGAGCAAAAGGCCAGCAAAAGGCCAGGAACCGTAAAAAGGCCGCGTTGCTGGCGTTT<br/> TTCCATAGGCTCCGCCCCCTGACGAGCATCAAAAATCGACGCTCAAGTCAGAGGTGGCGAAACCCGACAGGACTAT<br/> AAAGATAACCAGGCGTTTTCCCCTGGAAGCTCCCTCGTGGCTCTCCTGTTCCGACCCTGCCGTTACCGGATACCTGTCC<br/> GCCTTTCTCCCTTCGGGAAGCGTGGCGCTTCTCATAGCTCACGCTGTAGGTATCTCAGTTCGGTGTAGGTCGTTGCTC</p>                                                                                                                                                                                                                                                                                                                                                                                                                                                                                                                                                                                                                                                                                                                                                                                                                                                                                                                                                                                                                                                                                                                                                                                                                                                                                                                                                                                                                                                                                                                                                                                                                                                                                                                                                                                                                                                                                                                                                                                                                                                                                                                                                                                                                                                                                                                                                                                               |

CAAGCTGGGCTGTGTGCACGAACCCCCGTTAGCCCGACCGCTGCGCCTTATCCGGTAACTATCGTCTTGAGTCCAACC  
CGGTAAGACACGACTTATCGCCACTGGCAGCAGCCACTGGTAACAGGATTAGCAGAGCGAGGTATGTAGGCGGTGCTA  
CAGAGTTCTTGAAGTGGTGGCCTAACTACGGCTACACTAGAAGGACAGTATTTGGTATCTGCGCTCTGCTGAAGCCAGT  
TACCTTCGGAAAAAGAGTTGGTAGCTCTTGATCCGGCAAACAAACCACCGCTGGTAGCGGTGGTTTTTTTTGTTTGCAAG  
CAGCAGATTACGCGCAGAAAAAAGGATCTCAAGAAGATCCTTTGATCTTTTCTACGGGGTCTGACGCTCAGTGGAACG  
AAAACTACGTTAAGGGATTTTGGTCATGAGATTATCAAAAAGGATCTTCACCTAGATCCTTTTAAATAAAAATGAAGT  
TTTAAATCAATCTAAAGTATCCATGGATATGAGTAACTTGGTCTGACAGTTACCAATGCTTAATCAGTGAGGCACCTAT  
CTCAGCGATCTGTCTATTTGTTTCATCCATAGTTGCCTGACTCCCCGTCGTGTAGATAACTACGATACGGGAGGGCTTAC  
CATCTGGCCCCAGTGCTGCAATGATACCGCGAGACCCACGCTCACCGGCTCCAGATTTATCAGCAATAAACAGCCAGC  
CGGAAGGGCCGAGCGCAGAAGTGGTCCTGCAACTTATCCGCTCCATCCAGTCTATTAATTGTTGCCGGGAAGCTAGA  
GTAAGTAGTTGCGCAGTTAATAGTTTGCGCAACGTTGTTGCCATTGCTACAGGCATCGTGGTGTACGCTCGTCTGTTGG  
TATGGCTTCATTCAGCTCCGGTTCCTCAACGATCAAGGCGAGTTACATGATCCCCATGTTGTGCAAAAAAGCGTTAGCT  
CCTTCGGTCTCCGATCGTTGTCAGAAGTAAGTTGGCCGAGTGTTATCACTCATGGTTATGGCAGCACTGCATAATTCT  
CTTACTGTCATGCCATCCGTAAGATGCTTTTCTGTGACTGGTGAGTACTCAACCAAGTATTCTGAGAATAGTGTATGCG  
GCGACCGAGTTGCTCTTGCCCGGCGTCAACACGGGATAATACCGCGCCACATAGCAGAAGTTTAAAAGTGCTCATCATT  
GGAAAACGTTCTTCGGGGCGAAAACCTCAAGGATCTTACCGCTGTTGAGATCCAGTTCGATGTAACCCACTCGTGCAC  
CCAAGTATCTTCAGCATCTTTACTTTACCCAGCGTTTCTGGGTGAGCAAAAACAGGAAGGCAAAATGCCGCAAAAA  
GGGAATAAGGGCGACACGGAATGTTGAATACTCATACTCTTCTTTTCAATATTATTGAAGCATTATCAGGGTTATT  
GTCTCATGAGCGGATACATATTTGAATGTATTTAGAAAAATAAACAAAAAGAGCATGCGTTTGTAGAAACGCAAAAAAG  
GCCATCCGTCAGGATGGCCTTCTGCTTAATTTGATGCCTGGCAGTTTATGGCGGGCGTCTGCCCGCCACCCTCCGGGC  
CGTTGCTTCGCAACGTTCAAATCCGCTCCCGGCGGATTTGTCCTACTCAGGAGAGCGTTACCGACAAAACAACAGATAA  
AACGAAAGGCCAGTCTTTGACTGAGCCTTTGTTTTATTTGATGCCTGGCAGTTCCCTACTCTCGCATGGGGAGACCC  
CACACTACCATCGGCGCTACGGCGTTTCACTTCTGAGTTCGGCATGGGGTCAGGTGGGACCACCGCGCTACTGCCGCCA  
GGCAAATCTGTTTTATCAGACCGCTTCTGCGTTCTGATTAATCTGTATCAGGCTGAAAATCTTCTCATCCGCCAAAA  
CAGCCAAGCTGGAGACCGTTTAAACGGGCCCAAGCTTTTTGTAGAGCTCATCCATGCCATGTGTAATCCCAGCAGCAGT  
TACAACTCAAGAAGGACCATGTGGTCACGCTTTTCGTTGGGATCTTTCGAAAGGACAGATTGTGTGACAGGTAATGG  
TTGTCTGGTAAAAGGACAGGGCCATCGCCAATTGGAGATTTTGTGATAATGGTCTGCTAGTTGAACGGAACCATCTT  
CAACGTTGTGGCGAATTTTGAAGTTAGCTTTGATTCCATTCTTTGTTTGTCTGCCGTGATGTATACATTGTGTGAGTTAA  
AGTTGACTCGAGTTTGTGTCCAAGAATGTTCCATCTCTTAAAATCAATACCCTTAACTCGATACGATTAACAAGGG  
TATCACCTTCAAACCTGACTTCAGCACGCGTCTTGTAGGTCCCGTCATCTTTGAAAGATATAGTGCCTTCTGTACATAAC  
CTTCGGGCATGGCACTCTTGAAAAAGTCATGCCGTTTCATGTGATCCGGATAACGGGAAAAGCATTGAACACCATAGGT  
CAGAGTAGTGACAAGTGTGGCCACGGAACAGGTAGTTTTCCAGTAGTGCAAATAAATTTAAGGGTGAGTTTTCCGTTT  
GTAGCATCACCTTACCCTCTCCACGGACAGAAAATTTGTGCCATTAACATCACCATCTAATTCAACAAGAATTGGGAC  
AACTCCAGTGAAAAGTCTTCTCCTTTGCTCATACTAGTTTCTCCTGTTAGCCACCTAAATGTAACAGTCACGTCGGTT  
ATATTCAATCCCACACAACATACGAGCCGGAAGCATAAAGTGTAAGCCTGGGGTGCCTAATGAGTGAGCTAACTCACA  
TTAATTGCGTTGCGCTCTAGATGGTGCAAACCTTTCGCGGTATGGCATGATAGCGCCCCCAACCCATACAGAAGGTG

|          |                                                                                                                                                                                                                                                                                                                                                                                                                                                                                                                                                                                                                                                                                                                                                                                                                                                                                                                                                                                                                                                                                                                                                                                                                                                                                                                                                                                                                                                                                                                                                                                                                                                                                                                                                                                                                                                                                                                                                                                                                                                                                                                                                                                                                                                                                                                                                                                                                                                                                                                                                                                                                                                                                                                                                                                                                                                             |
|----------|-------------------------------------------------------------------------------------------------------------------------------------------------------------------------------------------------------------------------------------------------------------------------------------------------------------------------------------------------------------------------------------------------------------------------------------------------------------------------------------------------------------------------------------------------------------------------------------------------------------------------------------------------------------------------------------------------------------------------------------------------------------------------------------------------------------------------------------------------------------------------------------------------------------------------------------------------------------------------------------------------------------------------------------------------------------------------------------------------------------------------------------------------------------------------------------------------------------------------------------------------------------------------------------------------------------------------------------------------------------------------------------------------------------------------------------------------------------------------------------------------------------------------------------------------------------------------------------------------------------------------------------------------------------------------------------------------------------------------------------------------------------------------------------------------------------------------------------------------------------------------------------------------------------------------------------------------------------------------------------------------------------------------------------------------------------------------------------------------------------------------------------------------------------------------------------------------------------------------------------------------------------------------------------------------------------------------------------------------------------------------------------------------------------------------------------------------------------------------------------------------------------------------------------------------------------------------------------------------------------------------------------------------------------------------------------------------------------------------------------------------------------------------------------------------------------------------------------------------------------|
|          | AACACTGATGCCCCGCCCAAGCTCAAGTCCGATGACGAGGTAAGTACTCGAGGCGCCACCCTAGTGTGCTGAAGCGTTGCGG<br>TCCCATAGAGTTCACGCTCAGCGGAGTAGCAAAGGAGGTGGGGCTCTCCCGCGCAGCGTTAATCCAGCGCTTACCAA<br>CCGCGATACGCTGCTGGTGAGGATGATGGAGCGCGGCGTTCGAGCAGGTGCGGCATTACCTGAATGCGATACCGATAG<br>GCGCAGGGCCGCAAGGGCTCTGGGAATTTTTGCAGGTGCTCGTTTCGGAGCATGAACACTCGCAACGACTTCTCGGTGA<br>ACTATCTCATCTCCTGGTACGAGCTCCAGGTGCCGAGCTACGCACGCTTGCATCCAGCGGAACCGCGCGGTGGTGG<br>AGGGGATCCGCAAGCGACTGCCCCAGGTGCTCCTGCGGCAGCTGAGTTGCTCCTGCACTCGGTTCATCGCTGGCGCGA<br>CGATGCAGTGGGCCGTGATCCGGATGGTGAGCTAGCTGATCATGTGCTGGCTCAGATCGCTGCCATCCTGTGTTAAT<br>GTTTCCCGAACACGACGATTTCCAACCTCCAGGCACATGCGTAACATAGTATCCAAAATCTAAACCCGTCAAGCCCTC<br>AGGAGTGAATCATGACCGTAGTCACGACCGCCGATACTCCAACTGTACGCACTTGCAGCCCGACATGGGCTCAAGCT<br>CCATGGCCCCTGACTGTCAATGAGCTTGGGCTCGACTATAGGATCGTGATGCCACCCTGACGATGGACGTCGGTG<br>GGTGTGCGCATCCCGCGCGAGCCGAGGTAAGCGCGAAGGTGCAACCAGAGGCGCGGGTGTGGCAATGCTCAAGA<br>ATCGCCTGCCGTTTCGCGGTGCCGACTGGCGCGTGGCCAACGCCGAGCTCGTTGCCTATCCCATGCTCGAAGACTCGAC<br>TGCGATGGTCATCCAGCCTGGTTCGTCCACGCCGACTGGGTGCTGCCGAGGACTCGGAGGTCTTCGCGGAGAGCTT<br>CGCGACCGCGCTCGCCGCCCTGCATGCCGTCCCCATTTCCGCCCGCGTGGATGCGGGGATGCTCATCCGTACCCGACG<br>CAGGCCCGTCAGAAGGTGGCCGACGACGTTGACCGCGTCCGACGCGAGTTCGTGGTGAACGACAAGCGCCTCCACCG<br>GTGGCAGCGCTGGCTCGACGACGATTGCTCGTGCCAGATTTCTCCGTGGTGGTGCATGGCGATCTCTACGTGGGCCA<br>TGTGCTCATCGACAACACGGAGCGCGTCAGCGGGATGATCGACTGGAGCGAGGCCCGCGTTGATGACCCTGCCATCGA<br>CATGGCCGCGCACCTTATGGTCTTTGGTGAAGAGGGGCTCGCGAAGCTCCTCCTCACGTATGAAGCGGCCGGTGGCCG<br>GGTGTGGCCGCGGCTCGCCACCACATCGCGGAGCGCCTTGCCTCGGGGCGGTACCTACGCACTTTCGCCCTCGAC<br>TCGGGTAACGAAGAGTACCTCGCTGCGGCGAAGGCCGAGCTCGCCGACGCGGAATGAGGTGTGCAGAGTCCCTGCGG<br>CAGGCGACGAACACGACCGTCTCGATTAGTACCGGAGATCCTCCACCCGAAATTCTAAGGAGGAGACCATATGAGCG<br>TGAAGCAGAAGTCAGCGTTGCAGGACCTGGTTCGACTTCGCCAAGTGGCACGTGTGGACCAGGGTGCGGCCGTCCAGC<br>CGTGCGCGCCTGGCCTACGAGCTGTTCCCGACGACCACGAGGCCACGACCGAGGGCGCCTACATCAACCTCGGCTAC<br>TGGAAGCCCGGGTGCGCCGGCCTGGAGGAGGCCAACCAGGAGCTGGCGAACCAGCTCGCCGAGGCCGCGGGGATCA<br>GCGAGGGCGACGAGGTGCTCGACGTCGGGTTCCGGCTCGGCGCGCAGGACTTCTTCTGGCTCGAGACGCGCAAGCCG<br>GCCAGGATCGTCGGCGTCGACCTGACCCCGAGCCACGTCCGCATCGCCTCCGAGCGCGGGAGCGCGAGAACGTGCA<br>GGACCGCCTGCAGTTCAAGGAGGGCTCGGCGACCGACCTGCCCTTCGGCGCGGAGACCTTCGACCGCGTCACCTCCCT<br>GGAGTCGGCCCTGCACTACGAGCCGCGGACCGACTTCTTCAAGGGCGCGTTCGAGGTGCTCAAGCCCGGAGGCGTGT<br>GGCCATCGGCGACATCATCCCGCTCGACCTGCGCGAGCCCGTTCGACGAGCCCGAAGCTGGCGCCGACGCGTCT<br>GGGATCGCTGTCCGGCGGCATCCCGGTGGAGAACTGGGTGCCCGCGAGACCTACGCCAAGCAGCTCCGCGAAGCGG<br>GCTTCGTGACGTCGAGGTGAAGTCGGTCCGCGACAACGTGATGGAGCCCTGGCTGGACTACTGGCTGCGCAAGCTGC<br>AGGACGAGTCGTTCAAGAAGAGCGTGAGCAGGCTCTTCTACAGCCAGGTCAAGCGGTGCTGACCGAGCGACTCGGGC<br>ATGAAGGGCGAGCTGCCCGCGCTCGACTTCGTGATCGCCTCAGCCCGAAGCCCGCGCGTAGGGATCCGAATTCGGT<br>ACCTACGGTCGGTGGTATCGAAGTCTTGATCACTGTACACTAGAGGTAATACGGTTATCCACAGAATCAGGGG |
| pSense-2 | ATAACGCAGGAAAGAACATGTGAGCAAAAGGCCAGCAAAAGGCCAGGAACCGTAAAAAGGCCGCGTTGCTGGCGTTT<br>TTCCATAGGCTCCGCCCCCTGACGAGCATCACAAAAATCGACGCTCAAGTCAGAGGTGGCGAAACCCGACAGGACTAT                                                                                                                                                                                                                                                                                                                                                                                                                                                                                                                                                                                                                                                                                                                                                                                                                                                                                                                                                                                                                                                                                                                                                                                                                                                                                                                                                                                                                                                                                                                                                                                                                                                                                                                                                                                                                                                                                                                                                                                                                                                                                                                                                                                                                                                                                                                                                                                                                                                                                                                                                                                                                                                                                             |

AAAGATACCAGGCGTTTTCCCCTGGAAGCTCCCTCGTGCGCTCTCTGTTCCGACCCTGCCGCTTACCGGATACCTGTCC  
GCCTTTCTCCCTTCGGGAAGCGTGGCGCTTCTCATAGCTCACGCTGTAGGTATCTCAGTTCGGTGTAGGTCGTTGCTC  
CAAGCTGGGCTGTGTGCACGAACCCCCGTTAGCCCGACCGCTGCGCCTTATCCGGTAACTATCGTCTTGAGTCCAACC  
CGGTAAGACACGACTTATCGCCACTGGCAGCAGCCACTGGTAACAGGATTAGCAGAGCGAGGTATGTAGGCGGTGCTA  
CAGAGTTCTTGAAGTGGTGGCCTAACTACGGCTACACTAGAAGGACAGTATTTGGTATCTGCGCTCTGCTGAAGCCAGT  
TACCTTCGGAAAAAGAGTTGGTAGCTCTTGATCCGGCAAACAACCACCGCTGGTAGCGGTGGTTTTTTTTGTTTGCAAG  
CAGCAGATTACGCGCAGAAAAAAGGATCTCAAGAAGATCCTTTGATCTTTTCTACGGGGTCTGACGCTCAGTGGAAACG  
AAAACTCACGTTAAGGGATTTTGGTCATGAGATTATCAAAAAGGATCTTACCTAGATCCTTTTAAATTAATAAATGAAGT  
TTTAAATCAATCTAAAGTATCCATGGATATGAGTAACTTGGTCTGACAGTTACCAATGCTTAATCAGTGAGGCACCTAT  
CTCAGCGATCTGTCTATTTGTTTATCCATAGTTGCCTGACTCCCCGTCGTGTAGATAACTACGATACGGGAGGGCTTAC  
CATCTGGCCCCAGTGCTGCAATGATACCGCGAGACCCACGCTCACCGGCTCCAGATTTATCAGCAATAAACCAGCCAGC  
CGGAAGGGCCGAGCGCAGAAGTGGTCTGCAACTTATCCGCTCCATCCAGTCTATTAATTGTTGCCGGGAAGCTAGA  
GTAAGTAGTTCGCCAGTTAATAGTTTGCACAACGTTGTTGCCATTGCTACAGGCATCGTGGTGTACGCTCGTCGTTTGG  
TATGGCTTCATTAGCTCCGGTTCCCAACGATCAAGGCGAGTTACATGATCCCCATGTTGTGCAAAAAAGCGTTAGCT  
CCTTCGGTCTCCGATCGTTGTCAGAAGTAAGTTGGCCGAGTGTTATCACTCATGGTTATGGCAGCACTGCATAATTCT  
CTTACTGTATGCCATCCGTAAGATGCTTTTCTGTGACTGGTGTGACTCAACCAAGTATTCTGAGAATAGTGTATGCG  
GCGACCGAGTTGCTCTTGCCCGGCGTCAACACGGGATAATACCGCGCCACATAGCAGAAGTTTAAAAGTGCTCATCATT  
GGAAAACGTTCTTCGGGGCGAAAACCTCAAGGATCTTACCGCTGTTGAGATCCAGTTCGATGTAACCCACTCGTGCAC  
CCAAGTATCTTACGATCTTTTACTTACCAGCGTTTCTGGGTGAGCAAAAAACAGGAAGGCAAAATGCCGAAAAAA  
GGGAATAAGGGCGACACGGAAATGTTGAATACTCATACTTCTCTTTTCAATATTATTGAAGCATTATCAGGGTTATT  
GTCTCATGAGCGGATACATATTTGAATGTATTTAGAAAAATAAACAAAAAGAGCATGCGTTTGTAGAAAACGAAAAAG  
GCCATCCGTCAGGATGGCCTTCTGCTTAATTTGATGCCTGGCAGTTTATGGCGGGCGTCTGCCCGCCACCCTCCGGGC  
CGTTGCTTCGCAACGTTCAAATCCGCTCCCGGCGGATTTGCCTACTCAGGAGAGCGTTCACCGACAAACAACAGATAA  
AACGAAAGGCCAGTCTTTCGACTGAGCCTTTCGTTTTATTTGATGCCTGGCAGTTCCTACTCTCGCATGGGGAGACCC  
CACACTACCATCGGCGCTACGGCGTTTCACTTCTGAGTTCGGCATGGGGTCAGGTGGGACCACCGCGCTACTGCCGCCA  
GGCAAATTCTGTTTTATCAGACCGCTTCTGCGTTCTGATTAATCTGTATCAGGCTGAAAATCTTCTCTCATCCGCCAAAA  
CAGCCAAGCTGGAGACCGTTTAAACGGGCCCAAGCTTTTTGTAGAGCTCATCCATGCCATGTGTAATCCCAGCAGCAGT  
TACAAACTCAAGAAGGACCATGTGGTCACGCTTTTCGTTGGGATCTTTCGAAAGGACAGATTGTGTCGACAGGTAATGG  
TTGTCTGGTAAAAGGACAGGGCCATCGCCAATTGGAGATTTTGTGATAATGGTCTGCTAGTTGAACGGAACCATCTT  
CAACGTTGTGGCGAATTTTGAAGTTAGCTTTGATTCCATTCTTTGTTTGTCTGCCGTGATGTATACATTGTGTGAGTTAA  
AGTTGTAICTGAGTTTGTGTCCAAGAATGTTTCCATCTTCTTAAATCAATACCCTTTAACTCGATACGATTAACAAGGG  
TATCACCTTCAAACCTGACTTCAGCACGCGTCTTGTAGGTCCCGTCATCTTGAAGATATAGTGCCTTCTGTACATAAC  
CTTCGGGCATGGCACTCTTGA AAAAGTCATGCCGTTTTCATGTGATCCGGATAACGGGAAAAGCATTGAACACCATAGGT  
CAGAGTAGTGACAAGTGTGGCCACGGAACAGGTAGTTTTCCAGTAGTGCAATAAATTTAAGGGTGAAGTTTTCCGTTT  
GTAGCATCACCTTACCCTCTCCACGGACAGAAAATTTGTGCCATTAACATCACCATCTAATTCAACAAGAATTGGGAC  
AACTCCAGTGA AAAAGTCTTCTCCTTTGCTCATACTAGTTTCTCCTGTTAGCCACCTAAATGTAACAGTCACGTCGGTT

ATATTCAATCCCACACAACATACGAGCCGGAAGCATAAAGTGTAAAGCCTGGGGTGCCTAATGAGTGAGCTAACTCACA  
TTAATTGCGTTGCGCTCTAGATGGTGCAAAACCTTTCGCGGTATGGCATGATAGCGCCCCCAACCCATACAGAAGGTG  
AACACTGATGCCCCGCCCAAGCTCAAGTCCGATGACGAGGTAAGTCTGAGGCGCCACCGTAGTGCTGAAGCGTTGCGG  
TCCCATAGAGTTCACGCTCAGCGGAGTAGCAAAGGAGGTGGGGCTCTCCCGCGCAGCGTTAATCCAGCGCTTACCAA  
CCGCGATACGCTGCTGGTGAGGATGATGGAGCGCGCGTTCGAGCAGGTGCGGCATTACCTGAATGCGATACCGATAG  
GCGCAGGGCCGCAAGGGCTCTGGGAATTTTTGCAGGTGCTCGTTTCGAGCATGAACACTCGCAACGACTTCTCGGTGA  
ACTATCTCATCTCCTGGTACGAGCTCCAGGTGCCGGAGCTACGCACGCTTTCGATCCAGCGGAACCGCGCGGTGGTGG  
AGGGGATCCGCAAGCGACTGCCCCAGGTGCTCCTGCGGCAGCTGAGTTGCTCCTGCACTCGGTTCATCGCTGGCGCGA  
CGATGCAGTGGGCCGTCGATCCGGATGGTGAGTAGTCTGATCATGTGCTGGCTCAGATCGCTGCCATCCTGTGTTTAA  
GTTTCCCGAACACGACGATTTCCAACCTCTCCAGGCACATGCGTAACATAGTATCCAAAATCTAAACCCGTCAAGCCCTC  
AGGAGTGAATCATGACCGTAGTCACGACCGCGGATACCTCCAACCTGTACGCACTTGCAGCCCGACATGGGCTCAAGCT  
CCATGGCCCCGCTGACTGTCAATGAGCTTGGGCTCGACTATAGGATCGTGATCGCCACCGTCGACGATGGACGTCGGTG  
GGTGCTGCGCATCCCGCGCCGAGCCGAGGTAAGCGCGAAGGTGCAACCAGAGGCGCGGGTGTGGCAATGCTCAAGA  
ATCGCCTGCCGTTTCGCGGTGCCGACTGGCGCGTGCCAACGCCGAGCTCGTTGCCTATCCCATGCTCGAAGACTCGAC  
TGCGATGGTCATCCAGCCTGGTTCGTCCACGCCCCGACTGGGTGCTGCCGAGGACTCGGAGGTCTTCGCGGAGAGCTT  
CGCGACCGCGCTCGCCGCCCTGCATGCCGTCCCCATTTCCGCCCGCTGGATGCGGGGATGCTCATCCGTACACCGACG  
CAGGCCCGTCAGAAGGTGGCCGACGACGTTGACCGCGTCCGACCGAGTTCGTGGTGAACGACAAGCGCCTCCACCG  
GTGGCAGCGCTGGCTCGACGACGATTGTCGTGCGCAGATTTCTCCGTGGTGGTGCATGGCGATCTCTACGTGGGCCA  
TGTGCTCATCGACAACACGGAGCGCGTCAGCGGGATGATCGACTGGAGCGAGGCCCGGTTGATGACCTGCCATCGA  
CATGGCCGCGCACCTTATGGTCTTTGGTGAAGAGGGGCTCGCGAAGCTCCTCCTCACGTATGAAGCGGCCGGTGGCCG  
GGTGTGGCCGCGGCTCGCCACCACATCGCGGAGCGCCTTGCCTTCGGGGCGGTCACCTACGCACTTTCGCCCTCGAC  
TCGGGTAACGAAGAGTACCTCGCTGCGGCGAAGGCGCAGCTCGCCGAGCGGAATGAGGTGTGCAGAGTCCCTGCGG  
CAGGCGACGAACACGACCGTTCGTCGATTAGTACCCCTCTAGAAATAATTTTGTAACTTTAAGAAGGAGATATACCAT  
GGGCAGCAGCCATCATCATCATCACAGCAGCGCCTGGTGCCGCGCGGAGCCATATGAGCGTGAAGCAGAAGTC  
AGCGTTGCAGGACCTGGTTCGACTTCGCCAAGTGGCACGTGTGGACCAGGGTGGCGCCGTCCAGCCGTGCGCGCCTGG  
CCTACGAGCTGTTCCGCCGACGACCACGAGGCCACGACCGAGGGCGCTACATCAACCTCGGCTACTGGAAGCCCGGGT  
GCGCCGCGCCTGGAGGAGGCCAACAGGAGCTGGCGAACCAGCTCGCCGAGGCCGCGGGGATCAGCGAGGGCGACGA  
GGTGCTCGACGTCGGGTTCCGGGCTCGGCGCGCAGGACTTCTTGGCTCGAGACGCGCAAGCCGGCCAGGATCGTCG  
GCGTCGACCTGACCCCGAGCCACGTCCGCATCGCCTCCGAGCGCGGAGCGCGAGAAGTGCAGGACCGCCTGCAGT  
TCAAGGAGGGCTCGGCGACCGACCTGCCCTTCGGCGCGGAGACCTTCGACCGCGTCACTCCCTGGAGTCGGCCCTGC  
ACTACGAGCCGCGGACCGACTTCTTCAAGGGCGCGTTCGAGGTGCTCAAGCCCGGAGGCGTGTGGCCATCGGCGACA  
TCATCCCGCTCGACCTGCGCGAGCCCGGTTCCGACGGACCGCCGAAGCTGGCGCCGAGCGGTGCGGGATCGCTGTCCG  
GCGGCATCCCGGTGGAGAACTGGGTGCCCCGCGAGACCTACGCCAAGCAGCTCCGCGAAGCGGGCTTCGTGACGTC  
GAGGTGAAGTCGGTCCGCGACAACGTGATGGAGCCCTGGCTGGACTACTGGCTGCGCAAGCTGCAGGACGAGTCGTT  
CAAGAAGAGCGTGAGCAGGCTCTTCTACAGCCAGGTCAAGCGGTGCTGACCGAGCGACTCGGGCATGAAGGGCGAGC



|          |                                                                                                                                                                                                                                                                                                                                                                                                                                                                                                                                                                                                                                                                                                                                                                                                                                                                                                                                                                                                                                                                                                                                                                                                                                                                                                                                                                                                                                                                                                                                                                                                                                                                                                                                                                                                                                                                                                                                                                                                                                                                                                                                                                                                                                                                                                                                                                                                                                                                                                                                                                                                                                                                                                                                                         |
|----------|---------------------------------------------------------------------------------------------------------------------------------------------------------------------------------------------------------------------------------------------------------------------------------------------------------------------------------------------------------------------------------------------------------------------------------------------------------------------------------------------------------------------------------------------------------------------------------------------------------------------------------------------------------------------------------------------------------------------------------------------------------------------------------------------------------------------------------------------------------------------------------------------------------------------------------------------------------------------------------------------------------------------------------------------------------------------------------------------------------------------------------------------------------------------------------------------------------------------------------------------------------------------------------------------------------------------------------------------------------------------------------------------------------------------------------------------------------------------------------------------------------------------------------------------------------------------------------------------------------------------------------------------------------------------------------------------------------------------------------------------------------------------------------------------------------------------------------------------------------------------------------------------------------------------------------------------------------------------------------------------------------------------------------------------------------------------------------------------------------------------------------------------------------------------------------------------------------------------------------------------------------------------------------------------------------------------------------------------------------------------------------------------------------------------------------------------------------------------------------------------------------------------------------------------------------------------------------------------------------------------------------------------------------------------------------------------------------------------------------------------------------|
|          | TGCCCGCTCGACTTCGTGATCGCCTCAGCCCGCAAGCCGGCGCGTAGGGATCCGAATTCATATGGAATTCGGTACCTACGGTCCGGTGGTATCGAAGTCTTGATCACTGTACACTAGAGGTAATACGGTTATCCACAGAATCAGGGG                                                                                                                                                                                                                                                                                                                                                                                                                                                                                                                                                                                                                                                                                                                                                                                                                                                                                                                                                                                                                                                                                                                                                                                                                                                                                                                                                                                                                                                                                                                                                                                                                                                                                                                                                                                                                                                                                                                                                                                                                                                                                                                                                                                                                                                                                                                                                                                                                                                                                                                                                                                                     |
| pSense-3 | ATAACGCAGGAAAGAACATGTGAGCAAAAAGGCCAGCAAAAAGGCCAGGAACCGTAAAAAGGCCGCGTTGCTGGCGTTTTCATAGGCTCCGCCCCCTGACGAGCATCAAAAAATCGACGCTCAAGTCAGAGGTGGCGAAACCCGACAGGACTATAAAGATAACCAGGCGTTTCCCCTGGAAGCTCCCTCGTGCGCTCTCTGTTCCGACCCTGCCGTTACCGGATACCTGTCCGCCTTCTCCCTTCGGGAAGCGTGGCGCTTCTCATAGCTCACGCTGTAGGTATCTCAGTTCGGTGTAGGTCGTTGCTCAAGCTGGGCTGTGTGCACGAACCCCCGTTACGCCGACCGCTGCGCCTTATCCGGTAACTATCGTCTTGAGTCCAACCCGTAAGACACGACTTATCGCCACTGGCAGCAGCCACTGGTAACAGGATTAGCAGAGCGAGGTATGTAGGCGGTGCTACAGAGTCTTGAAGTGGTGGCCTAACTACGGCTACACTAGAAGGACAGTATTTGGTATCTGCGCTCTGCTGAAGCCAGTTACCTTCGGAAAAAGAGTTGGTAGCTCTTGATCCGGCAAACAAACCACCGCTGGTAGCGGTGGTTTTTTGTTTGAAGCAGCAGATTACGCGCAGAAAAAAGGATCTCAAGAAGATCCTTTGATCTTTTCTACGGGGTCTGACGCTCAGTGGAAACGAAACTCACGTTAAGGGATTTTGGTCATGAGATTATCAAAAAGGATCTTACCTAGATCCTTTTAAATTAATAATGAAGTTTAAATCAATCTAAAGTATCCATGGATATGAGTAACTTGGTCTGACAGTTACCAATGCTTAATCAGTGAGGCACCTATCTCAGCGATCTGTCTATTTGTTTCATCCATAGTTGCTGACTCCCCGTCGTGTAGATAACTACGATACGGGAGGGCTTACATCTGGCCCCAGTGCTGCAATGATACCGCGAGACCCACGCTCACCGGCTCCAGATTTATCAGCAATAAACCAGCCAGCCGGAAGGGCCGAGCGCAGAAGTGGTCTGCAACTTATCCGCCTCCATCCAGTCTATTAATTGTTGCCGGGAAGCTAGAGTAAGTAGTTCGCCAGTTAATAGTTTGCACAACGTTGTTGCCATTGCTACAGGCATCGTGGTGTACGCTCGTTCGTTGGTATGGCTTCATTCAGCTCCGGTTCCTAACGATCAAGGCGAGTTACATGATCCCCATGTTGTGCAAAAAAGCGGTTAGCTCCTTCGGTCTCCGATCGTTGTGAGAAGTAAGTTGGCCGAGTGTATCACTCATGGTTATGGCAGCACTGCATAATTCTTTACTGTGATGCCATCCGTAAGATGCTTTTCTGTGACTGGTGTGACTCAACCAAGTCATTCTGAGAATAGTGTATGCGGCGACCGAGTTGCTCTTGCCCGCGTCAACACGGGATAATACCGCGCCACATAGCAGAAGTTAAAAAGTGTCTCATCATTGGAAAACGTTCTTCGGGGCGAAAACCTCAAGGATCTTACCGCTGTTGAGATCCAGTTCGATGTAACCCACTCGTGACCCAATGATCTTCAGCATCTTTACTTTACCAGCGTTTCTGGGTGAGCAAAAACAGGAAGGCAAAATGCCGCAAAAAAGGAATAAGGGCGACACGGAAATGTTGAATACTCATACTCTTCTTTTCAATATTATTGAAGCATTTATCAGGGTTATTGTCTCATGAGCGGATACATATTTGAATGTATTTAGAAAAATAAACAAAAAGAGCATGCGTTTGTAGAAACGCAAAAAGGCCATCCGTCAGGATGGCCTTCTGCTTAATTTGATGCCTGGCAGTTTATGGCGGGCGTCTGCCCGCCACCCTCCGGGCGTTGCTTCGCAACGTTCAAATCCGCTCCCGGCGGATTTGTCCTACTCAGGAGAGCGTTCACCGACAACAACAGATAAACGAAAGGCCAGTCTTTCGACTGAGCCTTTCGTTTTATTTGATGCCTGGCAGTTCCTACTCTCGCATGGGGAGACCCCACTACCATCGGCGCTACGGCGTTTCACTTCTGAGTTCGGCATGGGGTCAGGTGGGACCACCGCGCTACTGCCGCCAGCAAATTCTGTTTTATCAGACCGCTTCTGCGTTCTGATTTAATCTGTATCAGGCTGAAAATCTTCTCTCATCCGCCAAAAAGCCAAGCTGGAGACCGTTTAAACGGGCCCAAGCTTTTTGTAGAGCTCATCCATGCCATGTGTAATCCAGCAGCAGTTACAAACTCAAGAAGGACCATGTGGTCACGCTTTTCGTTGGGATCTTTCGAAAGGACAGATTGTGTGACAGGTAATGGTTGTCTGGTAAAAGGACAGGGCCATCGCCAATTGGAGTATTTGTTGATAATGGTCTGCTAGTTGAACGGAACCATCTCAACGTTGTGGCGAATTTGAAGTTAGCTTTGATTCCATTCTTTGTTTGTCTGCCGTGATGATACATTGTGTGAGTTAAAGTTGTAAGTTCGAGTTTGTGTCCAAGAATGTTTCCATCTTCTTAAATCAATACCCTTTAACTCGATACGATTAACAAGGGTATCACCTTCAAACCTTGACTTCAGCACGCGTCTGTAGGTCCCGTCATCTTTGAAAGATATAGTGCCTTCTGTACATAAC |

CTTCGGGCATGGCACTCTTGAAAAAGTCATGCCGTTTCATGTGATCCGGATAACGGGAAAAGCATTGAACACCATAGGT  
CAGAGTAGTGACAAGTGTGGCCACGGAACAGGTAGTTTTCCAGTAGTGCAAATAAATTAAGGGTGAGTTTTCCGTTT  
GTAGCATCACCTTCACCCTCTCCACGGACAGAAAATTTGTGCCATTAACATCACCATCTAATTCAACAAGAATTGGGAC  
AACTCCAGTGAAAAGTTCTTCTCTTTGCTCATACTAGTTTCTCCTGTTAGCCACCTAAATGTAACAGTCACGTCGGTT  
ATATTCAATCCCACACAACATACGAGCCGGAAGCATAAAGTGTAAGCCTGGGGTGCCTAATGAGTGAGCTAACTACA  
TTAATTGCGTTGCGCTCTAGATGGTGCAAACCTTTGCGGGTATGGCATGATAGCGCCCCCAACCCATACAGAAGGTG  
AACACTGATGCCCCGCCCAAGCTCAAGTCCGATGACGAGGTAAGTACTCGAGGCCGCCACCGTAGTGCTGAAGCGTTGCGG  
TCCCATAGAGTTCACGCTCAGCGGAGTAGCAAAGGAGGTGGGGCTCTCCCGCGCAGCGTTAATCCAGCGCTTACCAA  
CCGCGATACGCTGCTGGTGAGGATGATGGAGCGCGCGTTCGAGCAGGTGCGGCATTACCTGAATGCGATACCGATAG  
GCGCAGGGCCGCAAGGGCTCTGGGAATTTTTGCAGGTGCTCGTTCGGAGCATGAACACTCGCAACGACTTCTCGGTGA  
ACTATCTCATCTCCTGGTACGAGCTCCAGGTGCCGAGCTACGCACGCTTGCATCCAGCGGAACCGCGCGGTGGTGG  
AGGGGATCCGCAAGCGACTGCCCCAGGTGCTCCTGCGGCAGCTGAGTTGCTCCTGCACTCGGTTCATCGCTGGCGGA  
CGATGCAGTGGGCCGTCGATCCGGATGGTGAGCTAGCTGATCATGTGCTGGCTCAGATCGCTGCCATCCTGTGTTAAT  
GTTTCCCGAACACGACGATTTCCAACCTCCTCAGGCACATGCGTAACATAGTATCCAAAATCTAAACCCGTCAAGCCCTC  
AGGAGTGAATCATGACCGTAGTCACGACCGCCGATACCTCCAACTGTACGCACTTGCAGCCCGACATGGGCTCAAGCT  
CCATGGCCCGTACTGTCAATGAGCTTGGGCTCGACTATAGGATCGTGATCGCCACCGTCGACGATGGACGTCGGTG  
GGTGCTGCGCATCCCGCGCGAGCCGAGGTAAGCGCGAAGGTGGAACAGAGGCGCGGGTGTGGCAATGCTCAAGA  
ATCGCCTGCCGTTGCGGGTCCCGACTGGCGCGTGGCCAACGCCGAGCTCGTTGCCTATCCATGCTCGAAGACTCGAC  
TGCATGGTTCATCCAGCCTGGTTCGTCACGCCCCGACTGGGTGTCGCGCAGGACTCGGAGGTCTTCGCGGAGAGCTT  
CGCGACCGCGCTCGCCGCCCTGCATGCCGTCCTCCATTTCCGCCGCCGTGGATGCGGGGATGCTCATCCGTACACCGACG  
CAGGCCCGTCAGAAGGTGGCCGACGACGTTGACCGCGTCCGACGCGAGTTCGTGGTGAACGACAAGCGCCTCCACCG  
GTGGCAGCGCTGGCTCGACGACGATTTCGTCGTGGCCAGATTTCTCCGTGGTGGTGCATGGCGATCTCTACGTGGGCCA  
TGTGCTCATCGACAACACGGAGCGCGTCAGCGGGATGATCGACTGGAGCGAGGCCCGCCTTGATGACCCTGCCATCGA  
CATGGCCGCGCACCTTATGGTCTTTGGTGAAGAGGGGCTCGCGAAGCTCCTCCTCACGTATGAAGCGGCCGGTGGCCG  
GGTGTGGCCGCGGCTCGCCACCACATCGCGGAGCGCCTTGCCTCGGGGCGGTACCTACGCACTTTCGCCCTCGAC  
TCGGGTAACGAAGAGTACCTCGTGCGGCGAAGGCGCAGCTCGCCGACGCGAATGAGGTGTGCAGAGTCCCTGCGG  
CAGGCGACGAACACGACCGTCGTCGATTAGTACCCGCGAAAT**TAATACGACTACTATAGGGGA**ATTGTGAGCGGATA  
ACAATCCCCTCTAGAAAATAATTTTGTAACTTTAAGAAGGAGATATACCATGGGCAGCAGCCATCATCATCATCA  
CAGCAGCGCCTGGTGCCGCGCGGAGCCATATGAGCGTGAAGCAGAAGTCAGCGTTGCAGGACCTGGTGCAGTTGCG  
CCAAGTGGCACGTGTGGACCAGGGTGCGGCCGTCCAGCCGTGCGCGCCTGGCCTACGAGCTGTTCCGCGACGACCAG  
AGGCCACGACCGAGGGCGCCTACATCAACCTCGGCTACTGGAAGCCCGGGTGCGCCGGCCTGGAGGAGGCCAACCAG  
GAGCTGGCGAACCAGCTCGCCGAGGCCGCGGGATCAGCGAGGGCGACGAGGTGCTCGACGTCGGGTTCCGGGCTCG  
GCGCGCAGGACTTCTTGGCTCGAGACGCGCAAGCCGGCCAGGATCGTCGGCGTCGACCTGACCCCGAGCCACGTCC  
GCATCGCCTCCGAGCGCGGAGCGCGAGAAGTGCAGGACCGCCTGCAGTTCAAGGAGGGCTCGGCGACCGACTG  
CCCTTCGGCGCGGAGACCTTCGACCGCGTCACCTCCCTGGAGTCGGCCCTGCACTACGAGCCGCGGACCGACTTCTCA  
AGGGCGCGTTCGAGGTGCTCAAGCCCGGAGGCGTGTGGCCATCGGCGACATCATCCCGCTCGACCTGCGCGAGCCCG

|                                                                                                                                                                                                                                                                                                                                                                                                                                                                       |
|-----------------------------------------------------------------------------------------------------------------------------------------------------------------------------------------------------------------------------------------------------------------------------------------------------------------------------------------------------------------------------------------------------------------------------------------------------------------------|
| GTTCCGACGGACCGCCGAAGCTGGCGCCGCAGCGGTCGGGATCGCTGTCCGGCGGCATCCCGGTGGAGAACTGGGTG<br>CCCCGCGAGACCTACGCCAAGCAGCTCCGCGAAGCGGGCTTCGTCGACGTCGAGGTGAAGTCGGTCCGCGACAACGTG<br>ATGGAGCCCTGGCTGGACTACTGGCTGCGCAAGCTGCAGGACGAGTCGTTCAAGAAGAGCGTGAGCAGGCTCTTCTAC<br>AGCCAGGTCAAGCGGTCGCTGACCAGCGACTCGGGCATGAAGGGCGAGCTGCCCCGCGCTCGACTTCGTGATCGCCTCA<br>GCCCCGAAGCCCGGCGCGTAGGGATCCGAATTCCATATGGAATTCGGTACCTACGGTCGGTGGTATCGAAGTCTTGATC<br>ACTGTACACTAGAGGTAATACGGTTATCCACAGAATCAGGGG |
|-----------------------------------------------------------------------------------------------------------------------------------------------------------------------------------------------------------------------------------------------------------------------------------------------------------------------------------------------------------------------------------------------------------------------------------------------------------------------|

**Supplementary Table S2.** Strains and plasmids used in this study.

| Bacterial Strain/plasmid      | Genotype/description                                                                                                                                                                                                                        | Reference                                  |
|-------------------------------|---------------------------------------------------------------------------------------------------------------------------------------------------------------------------------------------------------------------------------------------|--------------------------------------------|
| <i>E. coli</i> ® 10G          | F <sup>-</sup> <i>mcrA</i> Δ( <i>mrr-hsdRMS-mcrBC</i> ) <i>endA1 recA1</i><br>ϕ80 <i>lacZ</i> ΔM15 Δ <i>lacX74</i> <i>araD139</i><br>Δ( <i>ara,leu</i> )7697 <i>galU galK rpsL</i> (Str <sup>R</sup> ) <i>nupG</i> λ-<br><i>tonA</i>        | Lucigen                                    |
| <i>E. coli</i> TOP10          | F <sup>-</sup> <i>mcrA</i> Δ( <i>mrr-hsdRMS-mcrBC</i> )<br>ϕ80 <i>lacZ</i> ΔM15 Δ <i>lacX74</i> <i>recA1 araD139</i><br>Δ( <i>ara-leu</i> )7697 <i>galU galK</i> λ <sup>-</sup> <i>rpsL</i> (Str <sup>R</sup> ) <i>endA1</i><br><i>nupG</i> | Invitrogen                                 |
| <i>E. coli</i> BL21 (DE3)     | Used to express MphR for structure determination                                                                                                                                                                                            | Promega                                    |
| pMLGFP                        | Houses the reporter module (P <sub>MphR</sub> - <i>gfp</i> ) and <i>MphR</i> . Amp resistance.                                                                                                                                              | Gardner et al., Mol Biosyst. 2011, 7, 2554 |
| pMLGFPK                       | Derivative of pMLGFP with inserted <i>KpnI</i> restriction site to facilitate cloning mutant MphR genes. Amp resistance.                                                                                                                    | This study                                 |
| pJZ12                         | Carries the macrolide phosphotransferase MphA. Tet resistance.                                                                                                                                                                              | Gardner et al., Mol Biosyst. 2011, 7, 2554 |
| pCOLADuet-EryG                | Derivative of pCOLADuet containing wild-type EryG                                                                                                                                                                                           | This study                                 |
| pSense-MphR-MphA              | Derivative of pSense containing wild-type MphR and MphA                                                                                                                                                                                     | This study                                 |
| pSense-MphA-MphR-RBScalculate | Derivative of pSense-MphA-MphR with a calculated RBS                                                                                                                                                                                        | This study                                 |
| pSense-1                      | Derivative of pSense-MphA-MphR-RBScalculate containing EryG                                                                                                                                                                                 | This study                                 |
| pSense-2                      | Derivative of pSense-1 containing the pET28a RBS (AAGGAG) for EryG                                                                                                                                                                          | This study                                 |
| pSense-3                      | Derivative of pSense-2 containing the T7 promoter driving EryG                                                                                                                                                                              | This study                                 |
| pSense-M9C4-E7-MphA-EryG      | Derivative of pSense-3 containing M9C4 MphR with the E7 RBS upstream to it                                                                                                                                                                  | This study                                 |

**Supplementary Table S3.** Oligonucleotides used in this study.

| Entry | Primer name      | Sequence                                       |
|-------|------------------|------------------------------------------------|
| 1     | MphR_SSM_R122_F  | TACGCACGCTTGCATCCAGNNKAACCGCGCGGTGGTGGAGGGGAT  |
| 2     | MphR_SSM_R122_R  | ATCCCCTCCACCACCGCGCGGTTMNNCTGGATCGCAAGCGTGCCTA |
| 3     | MphR_SSM_N123_F  | ACGCTTGCATCCAGCGGNNKCGCGCGGTGGTGGAGGGGAT       |
| 4     | MphR_SSM_N123_R  | ATCCCCTCCACCACCGCGCGMNNCCGCTGGATCGCAAGCGT      |
| 5     | MphR_SDM_R122I_F | TACGCACGCTTGCATCCAGATTAACCGCGCGGTGGTGGAGGG     |
| 6     | MphR_SDM_R122I_R | CCCTCCACCACCGCGCGGTTAATCTGGATCGCAAGCGTGCCTA    |
| 7     | MphR_SDM_R122P_F | TACGCACGCTTGCATCCAGCCGAACCGCGCGGTGGTGGAGGG     |
| 8     | MphR_SDM_R122P_R | CCCTCCACCACCGCGCGGTTCCGGCTGGATCGCAAGCGTGCCTA   |
| 9     | MphR_SDM_R122N_F | TACGCACGCTTGCATCCAGAACAACCGCGCGGTGGTGGAGGG     |
| 10    | MphR_SDM_R122N_R | CCCTCCACCACCGCGCGGTTGTTCTGGATCGCAAGCGTGCCTA    |
| 11    | MphR_SDM_R122K_F | TACGCACGCTTGCATCCAGAAGAACCGCGCGGTGGTGGAGGG     |
| 12    | MphR_SDM_R122K_R | CCCTCCACCACCGCGCGGTTCTTCTGGATCGCAAGCGTGCCTA    |
| 13    | MphR_SDM_K132N_F | TGGAGGGGATCCGCAATCGACTGCCCCAGGTGCTC            |
| 14    | MphR_SDM_K132N_R | GAGCACCTGGGGGCAGTTCGATTGCGGATCCCCTCCA          |
| 15    | MphR_SDM_A151T_F | TGCTCCTGCACTCGGTCATCACTGGCGCGACGATGCAGTGG      |
| 16    | MphR_SDM_A151T_R | CCACTGCATCGTCGCGCCAGTGATGACCGAGTGCAGGAGCA      |
| 17    | MphR_SDM_H184Q_F | TGTTTAATGTTTCCCGAACAAAGACGATTTCCAACCTCTCCA     |
| 18    | MphR_SDM_H184Q_R | TGGAGGAGTTGAAAATCGTCTTGTTTCGGGAAACATTAAACA     |
| 19    | NCR              | GATAGCGCCCCCAACCCATACAGAAGGTGAACACTGATGC       |
| 20    | NCR              | GCATCAGTGTTACCTTCTGTATGGGTTGGGGGGCGCTATC       |
| 21    | K132N            | TGGAGGGGATCCGCAATCGACTGCCCCAGGTGCTC            |
| 22    | K132N            | GAGCACCTGGGGGCAGTTCGATTGCGGATCCCCTCCA          |
| 23    | A151T            | TGCTCCTGCACTCGGTCATCACTGGCGCGACGATGCAGTGG      |
| 24    | A151T            | CCACTGCATCGTCGCGCCAGTGATGACCGAGTGCAGGAGCA      |
| 25    | H184Q            | TGTTTAATGTTTCCCGAACAAAGACGATTTCCAACCTCTCCA     |
| 26    | H184Q            | TGGAGGAGTTGAAAATCGTCTTGTTTCGGGAAACATTAAACA     |
| 27    | R122I            | TACGCACGCTTGCATCCAGATTAACCGCGCGGTGGTGGAGGG     |
| 28    | R122I            | CCCTCCACCACCGCGCGGTTAATCTGGATCGCAAGCGTGCCTA    |
| 29    | MphR_INS_Kpn1_F  | CGTCGTTCGATTAGGTACCGGTACGG                     |
| 30    | MphR_INS_Kpn2_R  | CCGTACCGGTACCTAATCGACGACG                      |
| 31    | MphR_EPPCR_F     | CGAGCTCTAGATGGTGCAAAACCTTTC                    |
| 32    | MphR_EPPCR_R     | CTGCGTTATCCCCTGATTCT                           |

|    |                                     |                                                                                            |
|----|-------------------------------------|--------------------------------------------------------------------------------------------|
| 33 | CL2056                              | AAAccatggGGCATCATCATCATCATTTGGAAAACCTATACTTTCAAGGCCCGCCCC<br>AAGCTCAAG                     |
| 34 | CL2057                              | TTTgaattcCGGCCGCTACTAGTTTACGCATGTGCCTGGAGG                                                 |
| 35 | CL2062                              | ATGATGATGATGATGATGCCcctggtatatctcttcttaaagtt                                               |
| 36 | CL2063                              | CTCCAGGCACATCGCGTAAgaattcGAGCTCCGTCGACAAGCTTGcin                                           |
| 37 | A3_RBS_mutation_1                   | TAGCGCCCCCAACCCATACGGAAGGTGAACACTGATGC                                                     |
| 38 | A3_RBS_mutation_2                   | GCATCAGTGTTACCTTCCGTATGGGTTGGGGGGCGCTA                                                     |
| 39 | E7_RBS_mutation_1                   | GATAGCGCCCCCAACCCATACAGATGGTGAACACTGATGC                                                   |
| 40 | E7_RBS_mutation_2                   | GCATCAGTGTTACCATCTGTATGGGTTGGGGGGCGCTATC                                                   |
| 41 | H4_RBS_mutation_1                   | CCCAACCCATACAGAAGGCGAACACTGATGCC                                                           |
| 42 | H4_RBS_mutation_2                   | GGCATCAGTGTTGCCTTCTGTATGGGTTGGG                                                            |
| 43 | EryG_PCR_NcoI                       | ACTCACTATAGGGGAATTGTGAGCGGATAAC                                                            |
| 44 | EryG_PCR_HindIII                    | GCAAGCTTGTGACGGAGCTC                                                                       |
| 45 | MphR.F                              | TGGCATGATAGCGCCCCCAACCCATA                                                                 |
| 46 | MphR.R                              | GGGTTTAGATTTTGGATACTATGTTACGCATGTGC                                                        |
| 47 | MphA.F                              | CATAGTATCCAAAATCTAAACCCGTC                                                                 |
| 48 | MphA.R                              | GGGACTCTGCACACCTCATTCCGCTGCGGCG                                                            |
| 49 | pSENSE.F                            | GGCGCTATCATGCCATAC                                                                         |
| 50 | pSENSE.R                            | GGTGTGCAGAGTCCCTGC                                                                         |
| 51 | CalculRBS_MCS                       | <u>GGAGATCCTCCACCCGAAATTCTAaggaggaGACCATATGGAATTCGGTACCTACGGTCCG</u><br><u>TGGTATCGAAG</u> |
| 52 | pSense_MphAR_GA_1                   | ATATACATATGAGCGTGAAGCAGAAGTCAGC                                                            |
| 53 | pSense_MphAR_GA_2                   | ATATAGGTACCCCGGATCTCAGTGGTGGTGG                                                            |
| 54 | EryG_PCR_NdeI                       | ATATACATATGAGCGTGAAGCAGAAGTCAGC                                                            |
| 55 | pET28a_KpnI                         | ATATAGGTACCCCAATCCGGATATAGTTCCTCCTTCAG                                                     |
| 56 | pET28a_EryG_GA_1                    | CGTCGTCGATTAGTACCCCTCTAGAAATAATTTGTTAAC                                                    |
| 57 | pET28a_EryG_GA_2                    | GTACCGAATTCATATGGAATTCGGATCCCTACGC                                                         |
| 58 | pET28a_EryG_GA_3                    | CGTCGTCGATTAGTACCCGCGAAATTAATACGAC                                                         |
| 59 | pSense_MphAR_RBScal<br>culated_GA_1 | GCGTAGGGATCCGAATTCATATGGAATTCGGTACCTACG                                                    |
| 60 | pSense_MphAR_RBScal<br>culated_GA_2 | AACAAAATTATTTCTAGAGGGGTACTAATCGACGACGGTC                                                   |
| 61 | pSense_MphAR_RBScal<br>culated_GA_3 | GTCGTATTAATTTGCGGGTACTAATCGACGACGGTC                                                       |

---

|    |                         |                                       |
|----|-------------------------|---------------------------------------|
| 62 | pMLGFPK_E7M9C4_G<br>A_1 | TGGCATGATAGCGCC                       |
| 63 | pMLGFPK_E7M9C4_G<br>A_2 | GTTTAGATTTTGGATACTATGTTACGCATGTGCCTGG |
| 64 | pSense_3_GA_1           | CATAGTATCCAAAATCTAAACCCGTC AAG        |
| 65 | pSense_3_GA_2           | GGCGCTATCATGCCATACC                   |

---

**Supplementary Table S4.** Data collection and refinement statistics.

|                                       |                                               |
|---------------------------------------|-----------------------------------------------|
|                                       | MphR(A)-CLA                                   |
| Protein Data Bank code                | 6U18                                          |
| <i>Data collection</i>                |                                               |
| Space group                           | P2 <sub>1</sub> 2 <sub>1</sub> 2 <sub>1</sub> |
| Unit cell dimensions                  |                                               |
| a, b, c (Å)                           | 42.90, 53.16, 158.82                          |
| $\alpha$ , $\beta$ , $\gamma$ (°)     | 90.0, 90.0, 90.0                              |
| Resolution (Å)                        | 2.00 (29.14 – 2.00) <sup>a</sup>              |
| Completeness (%)                      | 99.9 (100.0) <sup>a</sup>                     |
| Redundancy                            | 6.1 (5.7) <sup>a</sup>                        |
| R <sub>merge</sub>                    | 0.048 (0.292) <sup>a</sup>                    |
| <I> / < $\sigma$ (I)>                 | (22.8) (5.3) <sup>a</sup>                     |
| CC <sub>1/2</sub>                     | 0.999 (0.959) <sup>a</sup>                    |
| <i>Refinement</i>                     |                                               |
| Resolution (Å)                        | 29.14 – 2.00                                  |
| No. reflections                       | 25416                                         |
| No. atoms (protein)                   | 6038                                          |
| R <sub>work</sub> / R <sub>free</sub> | 0.202 / 0.221                                 |
| Wilson <B-factor> (Å)                 | 23.9                                          |
| B <sub>ave</sub> (all atoms)          | 33.0                                          |
| RMS deviations                        |                                               |
| Bond lengths (Å)                      | 0.28                                          |
| Bond angles (°)                       | 0.41                                          |

<sup>a</sup> Values in parentheses are for highest resolution shell



**Supplementary Table S5.** LC-HRMS gradient and scan parameters.

| <b>Time (min)</b> | <b>% B</b> |
|-------------------|------------|
| 0.0               | 2.0        |
| 1.0               | 2.0        |
| 8.0               | 80.0       |
| 10.0              | 80.0       |
| 10.1              | 2.0        |
| 12.0              | 2.0        |

|                              |              |
|------------------------------|--------------|
| <b>Spray voltage</b>         | 3.5 kV       |
| <b>Capillary temperature</b> | 350 °C       |
| <b>Heater temp</b>           | 300 °C       |
| <b>S Lens RF level</b>       | 70 V         |
| <b>Sheath gas flow rate</b>  | 60           |
| <b>Resolution</b>            | 70,000       |
| <b>Scan Range</b>            | 250-1000 m/z |

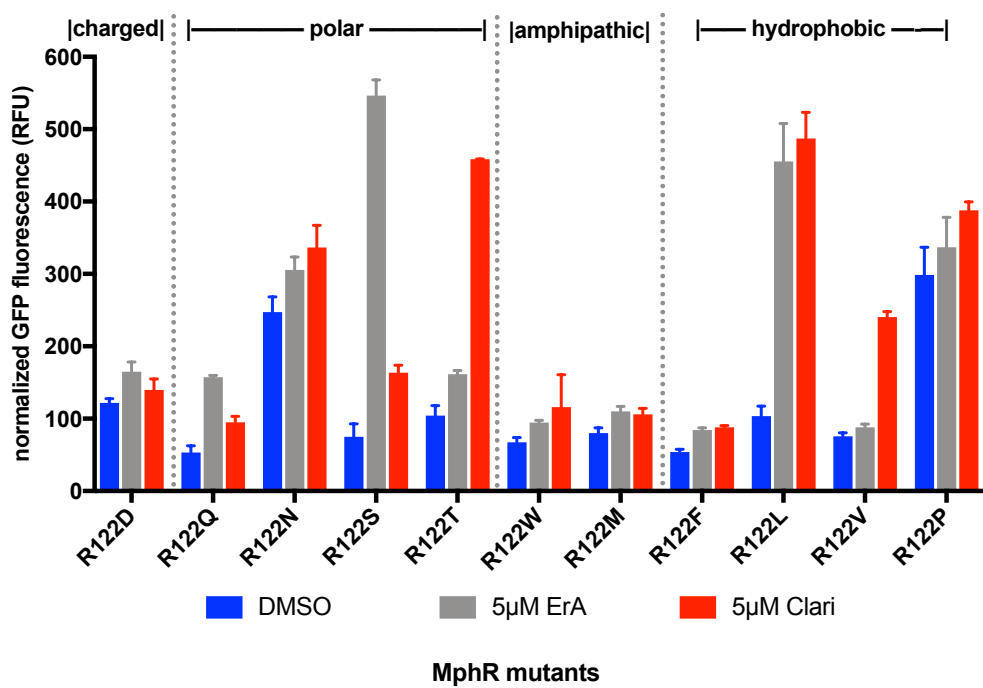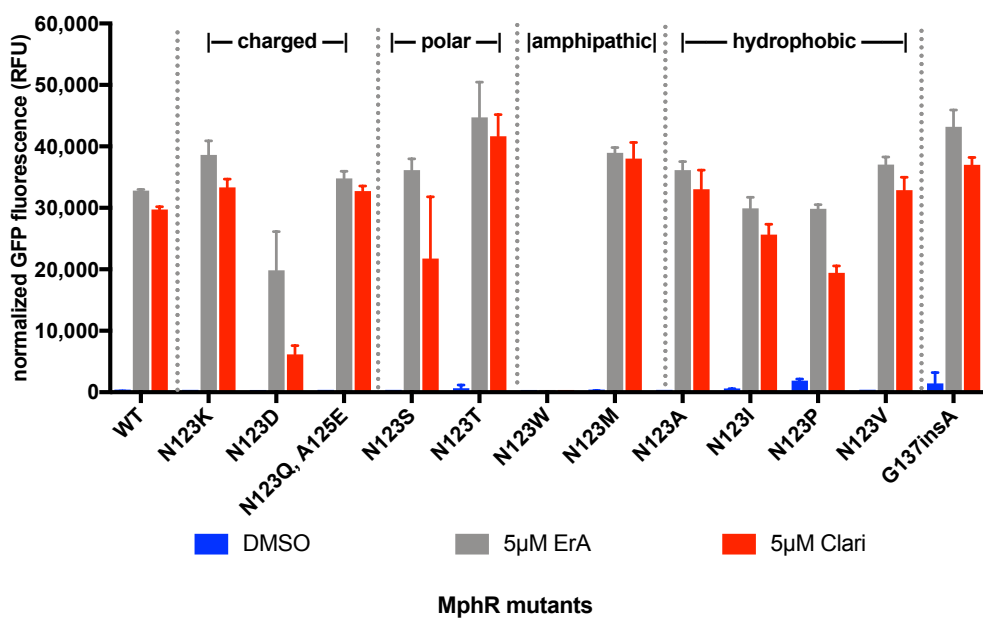

**Supplementary Figure S1.** Characterization of site-directed MphR biosensor variants. Activities of site-directed mutants using 5 µM ErA, 5 µM CLA, or dimethyl sulfoxide (DMSO). Error-bars represent the standard error of the mean ( $n = 3$ ). Note: A125E in the N123Q/A125E variant is the result of a spurious mutation. N123Q was not tested as a single mutant.

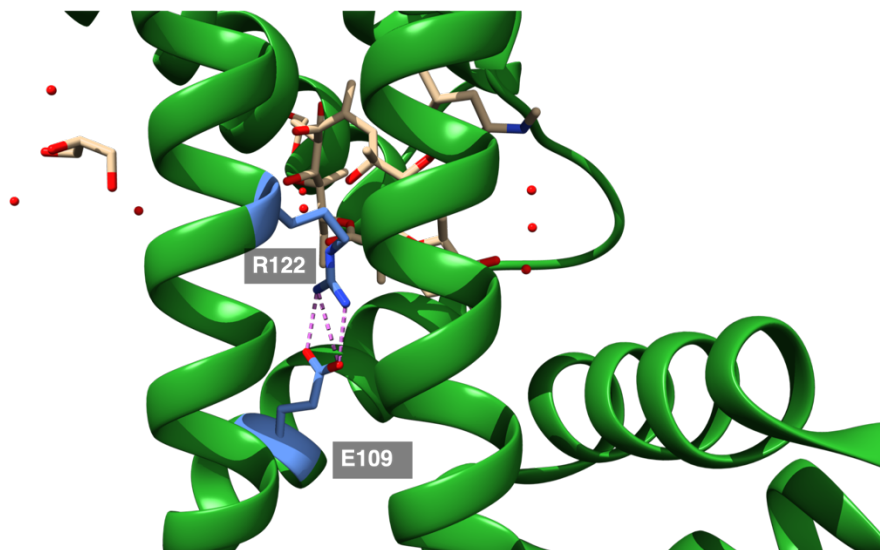

**Supplementary Figure S2.** The crystal structure of MphR (PDB: 3FRQ) complexed with ErA (green sticks). Locations of Arg122 and Glu109 (blue sticks) that form a salt bridge (dashed lines) are shown.

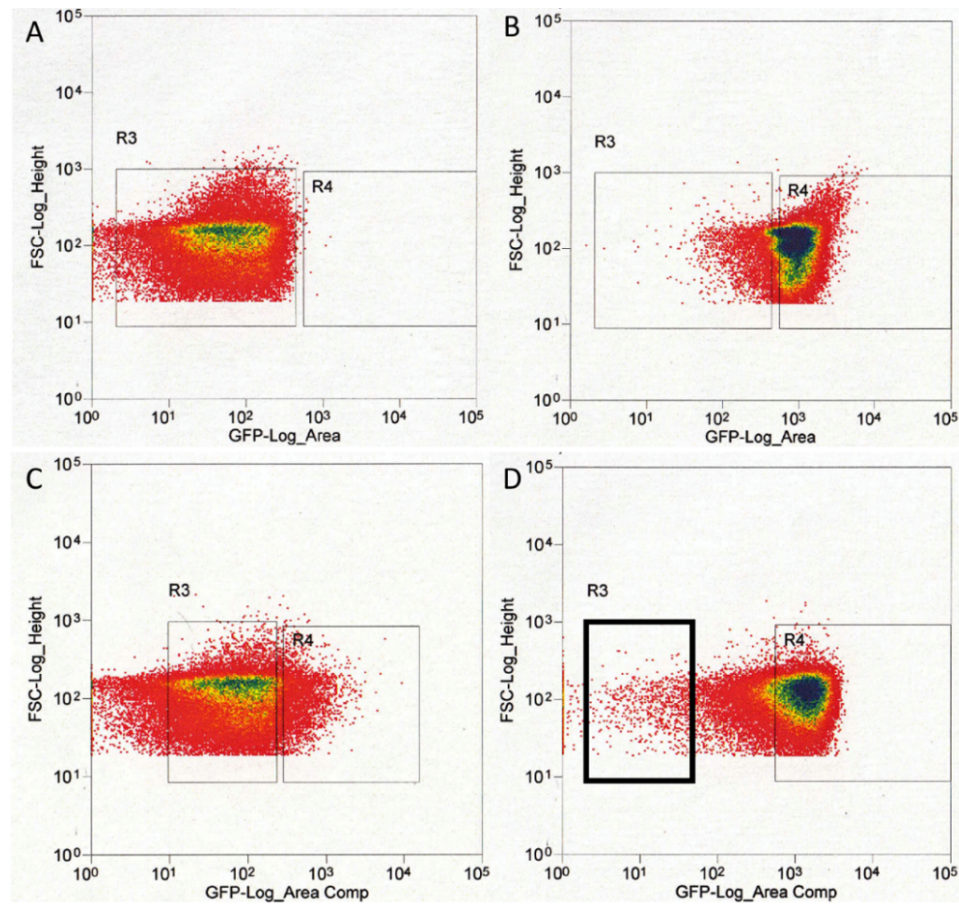

**Supplementary Figure S3.** FACS analysis and sorting of an error-prone PCR MphR mutant library. (A) Wild-type MphR in the absence of macrolides. (B) Wild-type MphR biosensor strain induced with addition of 5  $\mu$ M ErA. (C) MphR mutant library in the absence of macrolides. (D) Induction of the MphR mutant library with addition of 5  $\mu$ M ErA. The black box indicates the events corresponding to the  $\sim$ 5% of the library with the lowest fluorescence, corresponding to those variants that were poorly induced with ErA.

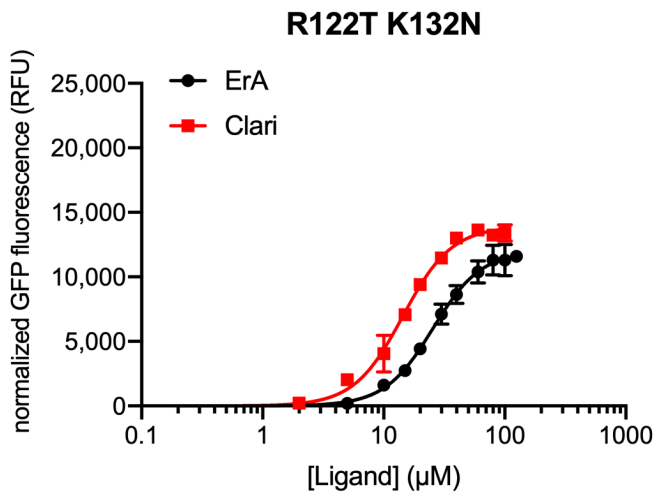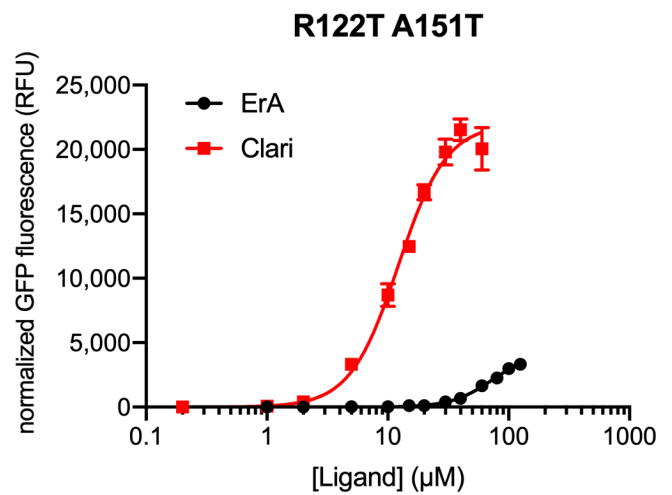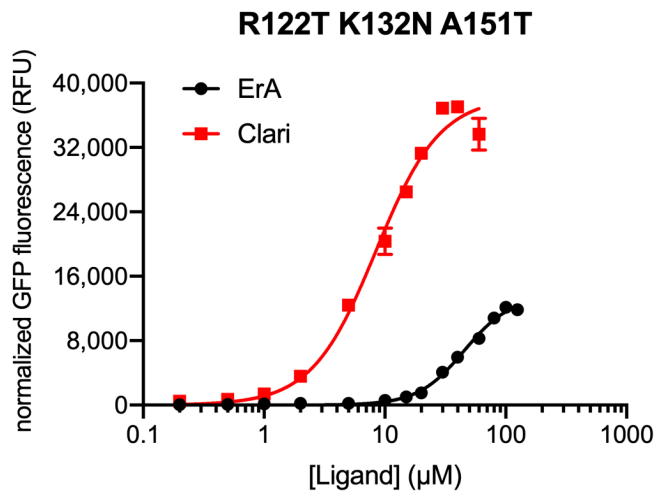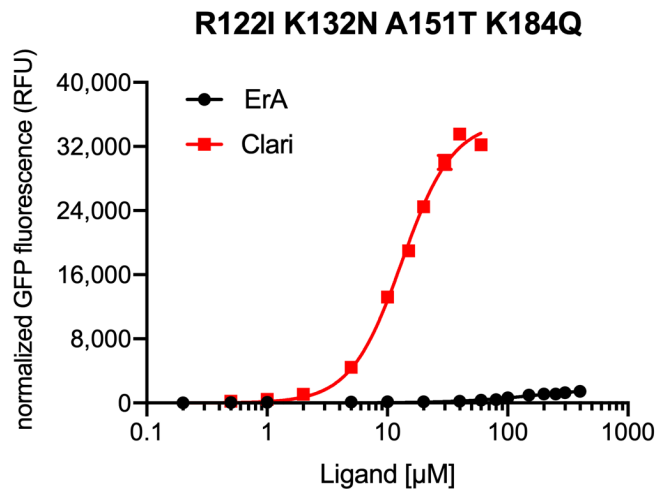

**Supplementary Figure S4.** Dose-response analysis of the macrolide specificity of mutants derived from M9C4. The biosensor strain is the two-plasmid system consisting of pMLGFP/pJZ12. Error-bars represent the standard error of the mean ( $n = 3$ ) and are only visible when larger than the data point symbol.

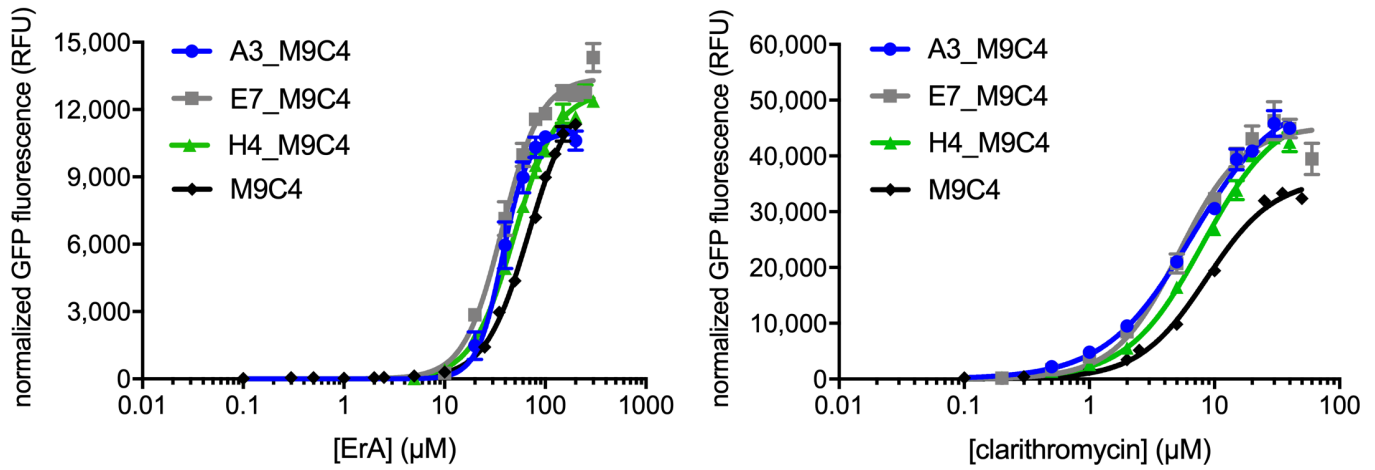

**Supplementary Figure S5.** Does-response analysis of RBS mutants of M9C4 MphR. The biosensor strain is the two-plasmid system consisting of pMLGFPK/pJZ12. Error-bars represent the standard error of the mean ( $n = 3$ ) and are only visible when larger than the data point symbol.

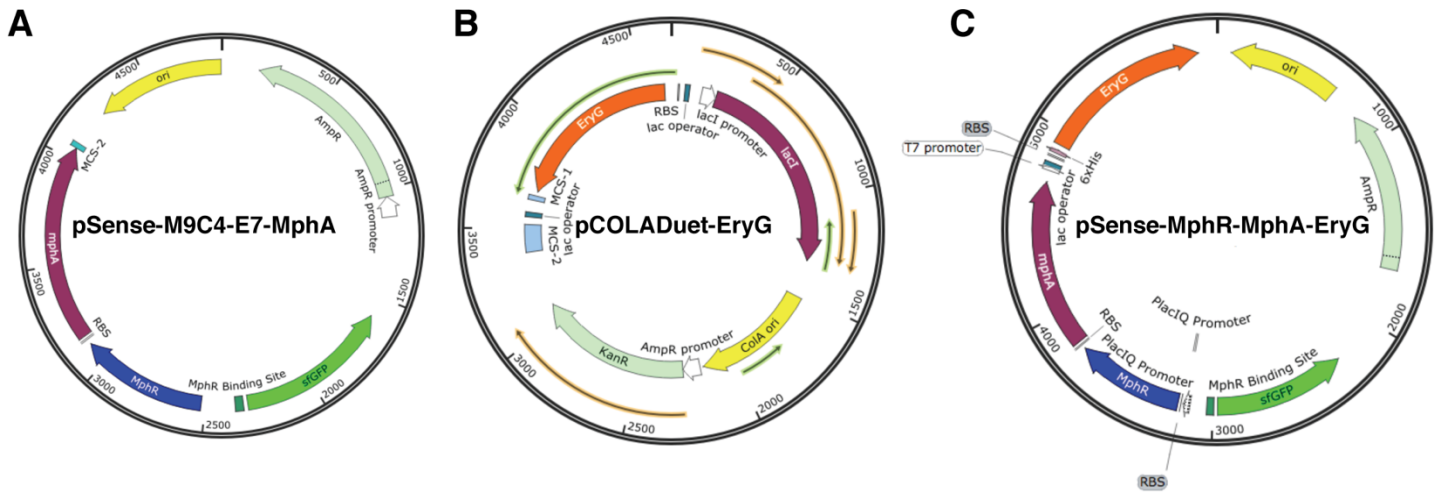

**Supplementary Figure S6.** Plasmid maps of the various MphR biosensor constructs. (A) pSense-MphR-MphA carries the minimal biosensor system components that the pSense series of plasmids were generated from. (B) pCOLADuet-EryG houses the *O*-MTase gene, EryG. (C) pSense-3 carries the EryG gene and the biosensor components in a single plasmid.

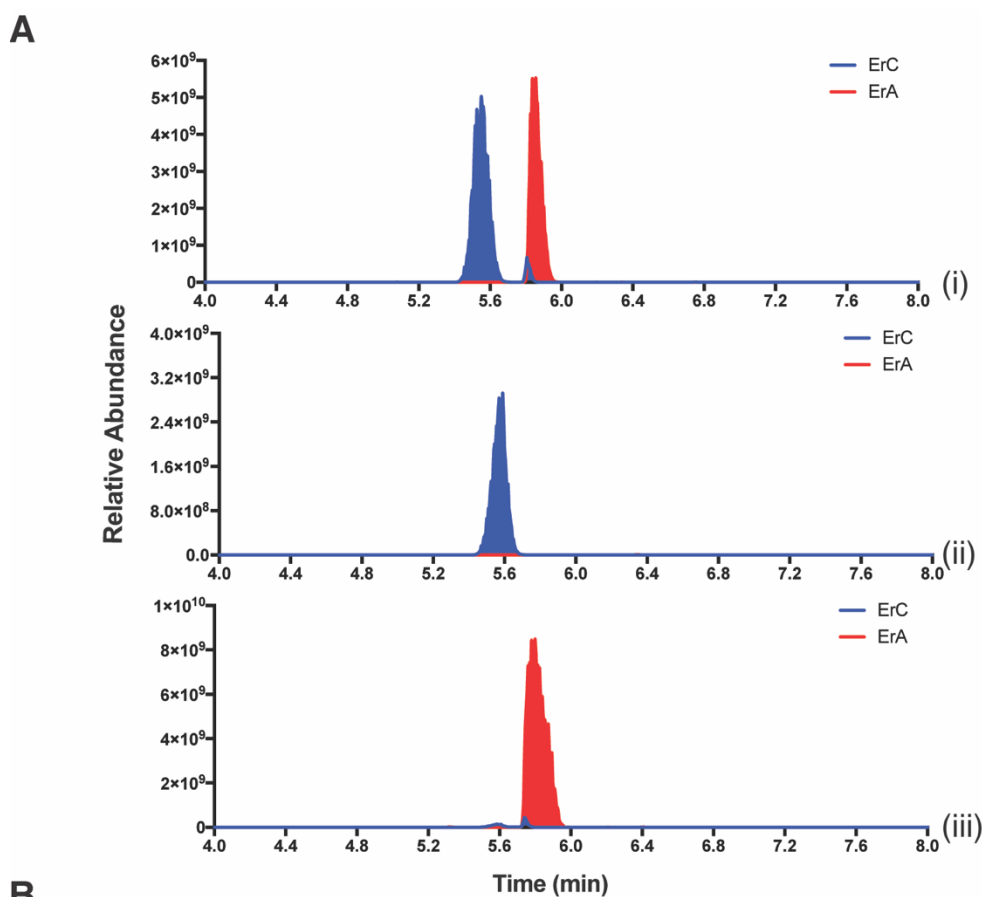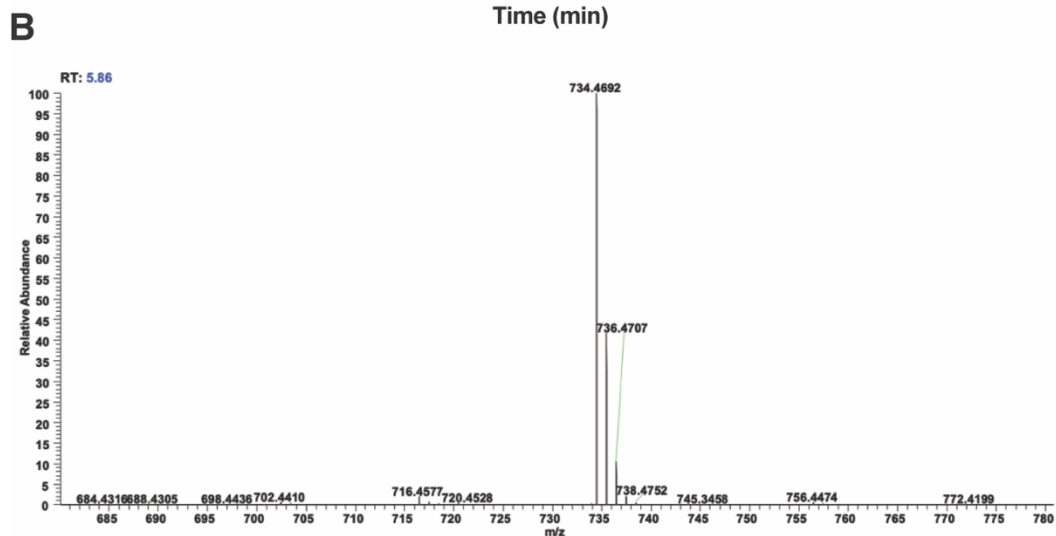

**Supplementary Figure S7.** Representative LC-MS chromatograms of ErA production by *E. coli* BL21(DE3) pCOLADuet-EryG. (A) Extracted ion chromatogram of (i) the *in vivo* conversion of ErC to ErA, (ii) ErC standard, and (iii) ErA standard. Calculated mass for ErA 734.4685 [M+H]<sup>+</sup> [C<sub>37</sub>H<sub>68</sub>NO<sub>13</sub>]<sup>+</sup>; observed mass for ErA standard 734.4689 (Δ, 0.54 ppm). Calculated mass for ErC 720.4529 [M+H]<sup>+</sup> [C<sub>36</sub>H<sub>67</sub>NO<sub>13</sub>]<sup>+</sup>; observed mass for ErC standard 720.4531 (Δ, 0.28 ppm). (B) The representative total ion spectra of ErA produced via *E. coli* BL21(DE3) pCOLADuet-EryG. Observed mass for ErA 734.4692 (Δ, 0.95 ppm)



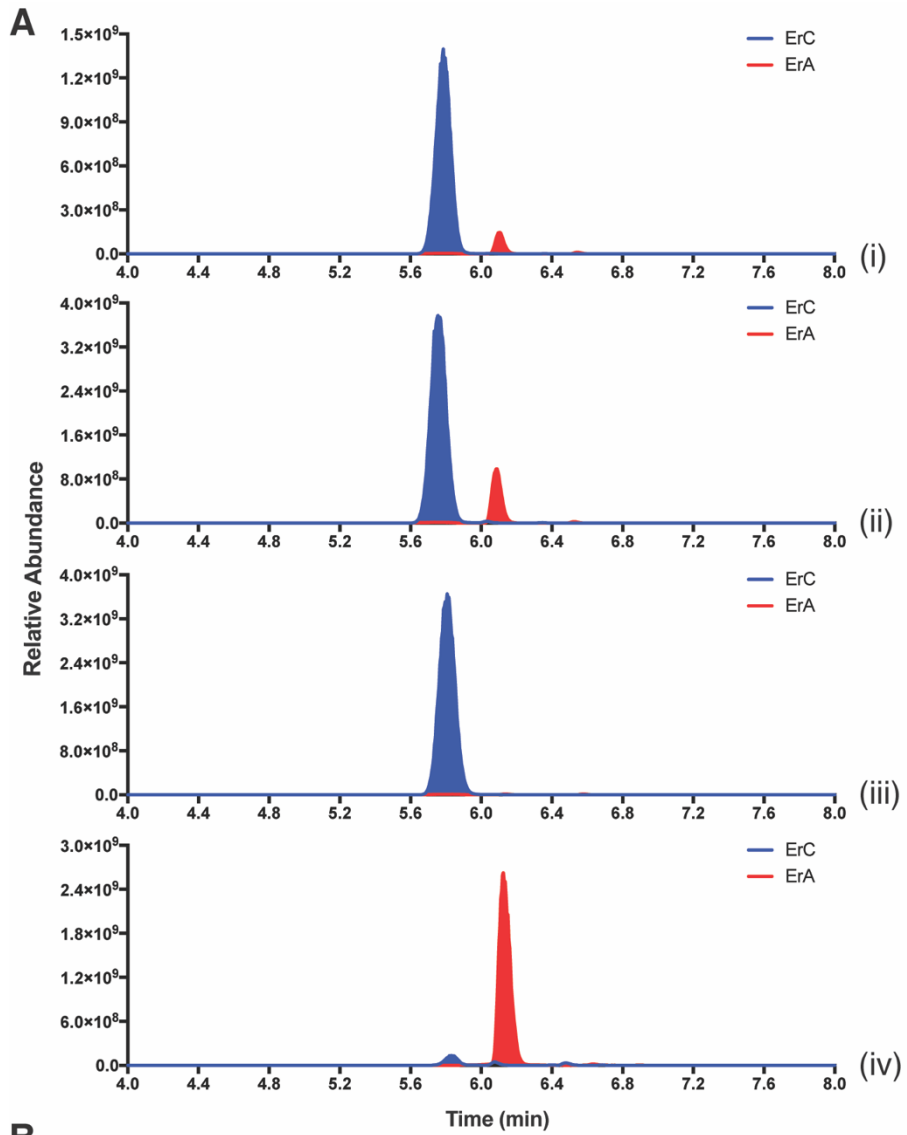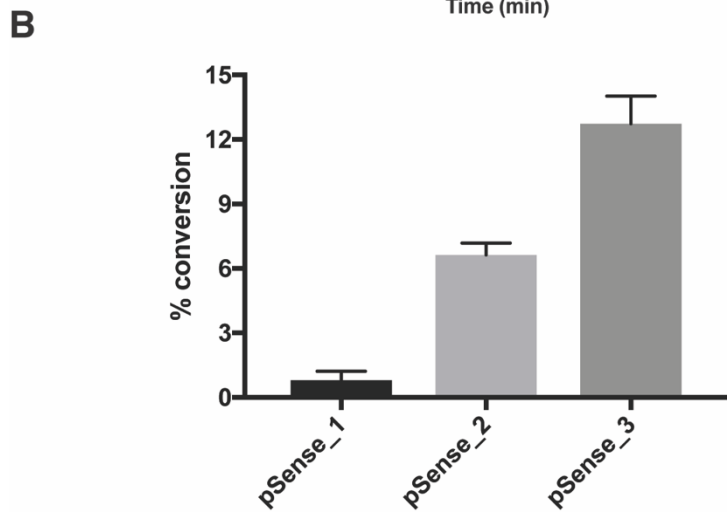

**Supplementary Figure S8.** ErA production by *E. coli* BL21(DE3) harboring various pSense constructs to determine the requirements for optimal *in vivo* EryG activity. (A) Representative extracted ion chromatogram of (i) ErA production catalyzed by EryG from pSense-2, (ii) ErA production catalyzed by EryG from pSense-3, (iii) ErC standard, (iv) ErA standard. Calculated mass for ErA 734.4685 [M+H]<sup>+</sup> [C<sub>37</sub>H<sub>68</sub>NO<sub>13</sub>]<sup>+</sup>; observed mass for ErA standard 734.4689 (Δ, 0.54 ppm). Calculated mass for ErC 720.4529 [M+H]<sup>+</sup> [C<sub>36</sub>H<sub>67</sub>NO<sub>13</sub>]<sup>+</sup>; observed mass for ErC standard 720.4531 (Δ, 0.28 ppm). (B) Percentage conversion of ErC to ErA supported by *E. coli* BL21(DE3) harboring pSense-1 (calculated RBS upstream of EryG, wild-type MphR), pSense-2 (pET28a RBS upstream of EryG, wild-type MphR), and pSense-3 (Entry 14 in **Table 1**; T7 promoter and pET28a RBS upstream of EryG, wild-type MphR). Error-bars represent the standard error of the mean (*n* = 3). Representative observed mass for ErA produced by pSense-3 734.4677 (Δ, -1.1 ppm). Representative observed mass for ErC in pSense-3 sample 720.4515 (Δ, -1.9 ppm).

MPRPKLKSDDEVLEAATVVVKRCGPIEFTLSGVAKEVGLSRAALIQRFTNRDTLLVRMMERGVEQVRHYLNAPI  
GAGPQGLWEFLQVLVRSMNTRNDFSVNYLISWYELQVPELRTLAIQTNRAVVEGIRNRLPPGAPAAAELLHSVI  
TGATMQWAVDPDGELADHVLAQIAAILCLMFPEQDDFQLLQAHA

**Supplementary Figure S9.** Protein sequence of MphR M9C4 used for structural analysis.

## SUPPLEMENTARY METHODS

### Construction of M9C4 RBS variants and pCOLADuet-EryG

For construction of M9C4-A3, M9C4 -E7, and M9C4 -H4, the pMLGFPK-M9C4 plasmid was used along with the primers listed in **Supplementary Table S3** (entries 37-42). The *eryG* gene was sub-cloned into pET28a from pET21c-EryG (kindly provided by Dr. Blaine Pfeifer, University of Buffalo). It was then PCR amplified (using primers EryG\_PCR\_NcoI and EryG\_PCR\_HindIII, entries 43-44, **Supplementary Table S3**) and sub-cloned into pCOLADuet via the restriction sites *NcoI* and *HindIII* to generate pCOLADuet-EryG.

### Construction of pSense\_MphR\_MphA (used for constructions of pSense-M9C4-MphA-EryG variants)

The pSense-2 plasmid containing *mphO* was ordered as two parts from Twist Bioscience and constructed using Gibson Assembly. MphR and MphA were PCR amplified out of pMLGFP and pJZ12, respectively using primers 45-48 (**Supplementary Table S3**). pSENSE2 was then PCR amplified using primers pSENSE.F and pSENSE.R (entries 49-50, **Supplementary Table S3**) to produce the vector fragment. The PCR products were evaluated using an agarose gel and the resulting products were extracted using an NEB Monarch Gel Extraction Kit. The three fragments were assembled via Gibson Assembly leveraging the NEBuilder Hifi DNA Assembly kit in accordance with the manufacturer's instructions. 2  $\mu$ L of the Gibson Assembly were then transformed into *E. coli* Top10 competent cells and the construct was sequenced to confirm successful assembly.

### Construction of pSense-M9C4-MphA-EryG variants

An RBS sequence identified via the RBS calculator was embedded into a 50 bp oligonucleotide (entry 51, **Supplementary Table S3**) that was synthesized by Integrated DNA Technologies. The RBS oligonucleotide was incorporated into pSense-MphR-MphA via Gibson Assembly using two primers (entries 52-53, **Supplementary Table S3**), furnishing pSense-MphA-MphR-RBScalculate. The sequencing data indicated 2 and 20 base pairs were randomly inserted before and after the 50-base oligonucleotide region in pSense-MphAR-RBScalculate but they are not expected to impact transcription/translation. The *eryG* gene was then amplified from pET28a-EryG and sub-cloned into pSense-MphA-MphR-RBScalculate via *NdeI* and *KpnI* restriction sites to generate 'pSense-1' using primers 54-55 (**Supplementary Table S3**). To generate 'pSense-2', the calculated RBS from pSense-1 was substituted with the RBS from pET28a via Gibson Assembly using primers 56-57 and 59-60 (**Supplementary Table S3**). To generate 'pSense-3', the promoter in pSense-1 was substituted by the T7 promoter via Gibson Assembly using primers 57-59 and 61 (**Supplementary Table S3**). To generate 'pSense-M9C4-E7-MphA-EryG' (relevant to **Figure 5B-D**), wild-type MphR in pSense-3 was substituted with M9C4-E7 (amplified from pMLGFPK-E7M9C4) via Gibson Assembly using primers 62-65 (**Supplementary Table S3**).

### *In vivo* assay of EryG activity

A 10 mL culture of BL21(DE3) containing the desired plasmids was grown in LB media supplemented with appropriate antibiotics at 37 °C with shaking at 250 rpm. The corresponding antibiotics for three-plasmid, two-plasmid and one-plasmid systems were ampicillin 67  $\mu$ g/mL, tetracycline 3  $\mu$ g/mL, kanamycin 33  $\mu$ g/mL; ampicillin 67  $\mu$ g/mL, kanamycin 33  $\mu$ g/mL; and ampicillin 100  $\mu$ g/mL. Cultures were grown to an OD<sub>600</sub> ~0.6 at which point 50  $\mu$ M ErC and 0.5 mM IPTG was added.

After incubating the cell culture at 37 °C and 250 rpm overnight, 1.5 mL of culture was withdrawn and centrifuged for 30 min at 10,000 g. Then, 500 µL of the supernatant was extracted three times with an equal volume of ethyl acetate and dried. The dried extract was resuspended in 200 µL of methanol for LC-HRMS analysis.

### **LC-HRMS analysis of ErA production**

LC-HRMS analysis was performed by the NC State the Molecular Education, Technology and Research Innovation Center using a Thermo Fisher Scientific Exactive Plus mass spectrometer and Heated Electrospray Ionization (HESI). The sample was analyzed via LC-MS injection into the mass spectrometer at a flow rate of 500 µL/min. The mobile phase B was acetonitrile with 0.1% formic acid and mobile phase A was water with 0.1% formic acid. See **Supplementary Table S5** for the gradient and HESI source parameters. The mass spectrometer was operated in positive ion mode. The LC column was a Thermo Hypersil Gold 50 x 2.1 mm, 1.9 µm particle size. This assay produces ErA and ErC that can be seen as their  $[M+H]^+$  ions. Calculated mass for ErA 734.4685  $[M+H]^+$   $[C_{37}H_{68}NO_{13}]^+$ ; representative observed mass for ErA 734.4689 ( $\Delta$ , 0.54 ppm). Calculated mass for ErC 720.4529  $[M+H]^+$   $[C_{36}H_{67}NO_{13}]^+$ ; representative observed mass for ErC 720.4531 ( $\Delta$ , 0.28 ppm). In every case, the error ( $\Delta = [\text{Difference/exact mass} \times 10^6]$ ) was < 6 ppm.
